# Supplementary material for: Development of a minimum dataset for subacute rehabilitation: a three-round e-Delphi consensus study
Source: HighWire-hosted journal article supplement (doi:10.1136/bmjopen-2021-058725), 2022-03-01
Supplement: bmjopen-2021-058725supp003_data_supplement.pdf [file bmjopen-2021-058725supp003_data_supplement.pdf]

## SUPPLEMENTARY MATERIAL

## Supplementary File 3. Round 2 participant ratings (n=32)

| Items                                                 |                                                                                                            | Participant ratings   |   |   |           |                             |   |   |           |           |    |   |           | Response Count |
|-------------------------------------------------------|------------------------------------------------------------------------------------------------------------|-----------------------|---|---|-----------|-----------------------------|---|---|-----------|-----------|----|---|-----------|----------------|
|                                                       |                                                                                                            | Of limited importance |   |   |           | Important but not essential |   |   |           | Essential |    |   |           |                |
|                                                       |                                                                                                            | 1                     | 2 | 3 | 1-3 Total | 4                           | 5 | 6 | 4-6 Total | 7         | 8  | 9 | 7-9 Total |                |
| <b>Provider demographics</b>                          |                                                                                                            |                       |   |   |           |                             |   |   |           |           |    |   |           |                |
| Service and rehabilitation unit – General information | 1. <b>Setting: Inpatient/outpatient, day therapy</b>                                                       | 0                     | 0 | 0 | 0 (0%)    | 1                           | 2 | 3 | 6 (19%)   | 8         | 10 | 8 | 26 (81%)  | 32             |
|                                                       | 2. <b>Hours/days of operation (i.e., 5 vs 6 vs 7 day rehabilitation service)</b>                           | 0                     | 0 | 1 | 1 (3%)    | 2                           | 4 | 3 | 9 (28%)   | 10        | 8  | 4 | 22 (69%)  | 32             |
|                                                       | 3. <b>Services available</b>                                                                               | 0                     | 3 | 1 | 4 (13%)   | 2                           | 1 | 4 | 7 (22%)   | 10        | 6  | 5 | 21 (66%)  | 32             |
|                                                       | 4. <b>Service capability level i.e., Clinical Services Capability Framework level of service provision</b> | 0                     | 0 | 2 | 2 (6%)    | 3                           | 3 | 3 | 9 (28%)   | 15        | 2  | 4 | 21 (66%)  | 32             |
|                                                       | 5. <b>Staffing levels (e.g., Ratio of each discipline to client numbers)</b>                               | 0                     | 2 | 2 | 4 (13%)   | 2                           | 4 | 3 | 9 (28%)   | 10        | 3  | 6 | 19 (59%)  | 32             |

## SUPPLEMENTARY MATERIAL

|                                                  |          |          |          |                |          |          |          |                 |           |          |          |                 |           |
|--------------------------------------------------|----------|----------|----------|----------------|----------|----------|----------|-----------------|-----------|----------|----------|-----------------|-----------|
| 6. <b>Location</b>                               | <b>0</b> | <b>0</b> | <b>1</b> | <b>1 (3%)</b>  | <b>4</b> | <b>4</b> | <b>4</b> | <b>12 (38%)</b> | <b>11</b> | <b>3</b> | <b>5</b> | <b>19 (59%)</b> | <b>32</b> |
| 7. <b>Public/private service</b>                 | <b>0</b> | <b>0</b> | <b>0</b> | <b>0 (0%)</b>  | <b>5</b> | <b>2</b> | <b>7</b> | <b>14 (44%)</b> | <b>7</b>  | <b>5</b> | <b>6</b> | <b>18 (56%)</b> | <b>32</b> |
| 8. <b>Facility/Hospital name</b>                 | <b>0</b> | <b>1</b> | <b>0</b> | <b>1 (3%)</b>  | <b>5</b> | <b>3</b> | <b>5</b> | <b>13 (41%)</b> | <b>9</b>  | <b>4</b> | <b>5</b> | <b>18 (56%)</b> | <b>32</b> |
| 9. <b>Clinic/medicare code</b>                   | <b>0</b> | <b>1</b> | <b>1</b> | <b>2 (6%)</b>  | <b>6</b> | <b>1</b> | <b>5</b> | <b>12 (38%)</b> | <b>10</b> | <b>4</b> | <b>4</b> | <b>18 (56%)</b> | <b>32</b> |
| 10. <b>Name of ward/clinic</b>                   | <b>0</b> | <b>3</b> | <b>2</b> | <b>5 (16%)</b> | <b>3</b> | <b>2</b> | <b>6</b> | <b>11 (34%)</b> | <b>7</b>  | <b>4</b> | <b>5</b> | <b>16 (50%)</b> | <b>32</b> |
| 11. Post-code                                    | 0        | 1        | 4        | 5 (16%)        | 3        | 3        | 6        | 12 (38%)        | 8         | 2        | 5        | 15 (47%)        | 32        |
| 12. Geographical remoteness                      | 0        | 0        | 2        | 2 (6%)         | 4        | 6        | 5        | 15 (47%)        | 8         | 3        | 4        | 15 (47%)        | 32        |
| 13. Hospital and health service district         | 0        | 2        | 1        | 3 (9%)         | 6        | 3        | 6        | 15 (47%)        | 7         | 3        | 4        | 14 (44%)        | 32        |
| 14. Clinic/ward size                             | 1        | 3        | 5        | 9 (28%)        | 3        | 2        | 4        | 9 (28%)         | 7         | 5        | 2        | 14 (44%)        | 32        |
| 15. Funding model (e.g., Activity based funding) | 1        | 1        | 1        | 3 (9%)         | 3        | 4        | 9        | 16 (50%)        | 6         | 3        | 4        | 13 (41%)        | 32        |

## SUPPLEMENTARY MATERIAL

|                                                                              |                                                                                                                               |          |          |          |               |          |          |          |                 |           |          |          |                 |           |
|------------------------------------------------------------------------------|-------------------------------------------------------------------------------------------------------------------------------|----------|----------|----------|---------------|----------|----------|----------|-----------------|-----------|----------|----------|-----------------|-----------|
|                                                                              | 16. Access to other specialty services                                                                                        | 0        | 2        | 1        | 3 (9%)        | 5        | 5        | 7        | 17 (53%)        | 5         | 5        | 2        | 12 (38%)        | 32        |
|                                                                              | 17. Flex beds available                                                                                                       | 1        | 3        | 11       | 15 (47%)      | 6        | 2        | 4        | 12 (38%)        | 3         | 2        | 0        | 5 (16%)         | 32        |
| Service and rehabilitation unit –<br>Treating team, facilities and resources | 18. <b>Treating disciplines (e.g., physicians, nursing, allied health disciplines, recreation officer, animal therapists)</b> | <b>0</b> | <b>1</b> | <b>0</b> | <b>1 (3%)</b> | <b>1</b> | <b>1</b> | <b>0</b> | <b>2 (6%)</b>   | <b>18</b> | <b>3</b> | <b>8</b> | <b>29 (91%)</b> | <b>32</b> |
|                                                                              | 19. <b>Occasions of service (and time spent) for each client for each discipline</b>                                          | <b>0</b> | <b>1</b> | <b>0</b> | <b>1 (3%)</b> | <b>0</b> | <b>2</b> | <b>2</b> | <b>4 (13%)</b>  | <b>14</b> | <b>7</b> | <b>6</b> | <b>27 (84%)</b> | <b>32</b> |
|                                                                              | 20. <b>Type of service provided (e.g., consult service only, consult and intervention, general or specialist)</b>             | <b>0</b> | <b>1</b> | <b>0</b> | <b>1 (3%)</b> | <b>1</b> | <b>3</b> | <b>3</b> | <b>7 (22%)</b>  | <b>10</b> | <b>9</b> | <b>5</b> | <b>24 (75%)</b> | <b>32</b> |
|                                                                              | 21. <b>Specialist outpatient therapies (e.g., hypertonicity,</b>                                                              | <b>0</b> | <b>1</b> | <b>0</b> | <b>1 (3%)</b> | <b>4</b> | <b>2</b> | <b>4</b> | <b>10 (31%)</b> | <b>14</b> | <b>5</b> | <b>2</b> | <b>21 (66%)</b> | <b>32</b> |

## SUPPLEMENTARY MATERIAL

|                                                                                                                                                                                                            |          |          |          |                |          |          |          |                 |           |          |          |                 |           |  |
|------------------------------------------------------------------------------------------------------------------------------------------------------------------------------------------------------------|----------|----------|----------|----------------|----------|----------|----------|-----------------|-----------|----------|----------|-----------------|-----------|--|
| <b>memory,<br/>vestibular clinics)</b>                                                                                                                                                                     |          |          |          |                |          |          |          |                 |           |          |          |                 |           |  |
| <b>22. Rehabilitation<br/>care environment<br/>features (e.g.,<br/>gyms, dining<br/>rooms, outdoor<br/>areas,<br/>independent<br/>living rooms,<br/>hydrotherapy,<br/>space for family,<br/>delta dog)</b> | <b>0</b> | <b>3</b> | <b>1</b> | <b>4 (13%)</b> | <b>3</b> | <b>3</b> | <b>4</b> | <b>10 (31%)</b> | <b>11</b> | <b>6</b> | <b>1</b> | <b>18 (56%)</b> | <b>32</b> |  |
| 23. Specialist<br>equipment (e.g.,<br>robots)                                                                                                                                                              | 0        | 2        | 1        | 3 (9%)         | 6        | 2        | 9        | 17 (53%)        | 9         | 2        | 1        | 12 (38%)        | 32        |  |
| 24. Qualifications and<br>level/years of<br>experience                                                                                                                                                     | 0        | 3        | 6        | 9 (28%)        | 4        | 3        | 8        | 15 (47%)        | 6         | 2        | 0        | 8 (25%)         | 32        |  |
| 25. Name and contact<br>details of treating<br>staff                                                                                                                                                       | 2        | 4        | 4        | 10 (31%)       | 8        | 5        | 2        | 15 (47%)        | 6         | 0        | 1        | 7 (22%)         | 32        |  |

## SUPPLEMENTARY MATERIAL

| Patients and caregivers information             |                                                  |   |   |   |        |   |   |   |          |    |   |    |           |    |
|-------------------------------------------------|--------------------------------------------------|---|---|---|--------|---|---|---|----------|----|---|----|-----------|----|
| Client –<br>Basic<br>demographic<br>information | 26. Age, Date of birth                           | 0 | 0 | 0 | 0 (0%) | 0 | 0 | 0 | 0 (0%)   | 12 | 3 | 16 | 31 (100%) | 31 |
|                                                 | 27. Sex/gender                                   | 0 | 0 | 0 | 0 (0%) | 0 | 2 | 1 | 3 (10%)  | 14 | 1 | 13 | 28 (90%)  | 31 |
|                                                 | 28. Aboriginal and Torres Strait Islander status | 0 | 0 | 0 | 0 (0%) | 0 | 1 | 2 | 3 (10%)  | 11 | 7 | 10 | 28 (90%)  | 31 |
|                                                 | 29. Language                                     | 0 | 0 | 0 | 0 (0%) | 1 | 1 | 3 | 5 (16%)  | 15 | 4 | 7  | 26 (84%)  | 31 |
|                                                 | 30. Education level                              | 0 | 0 | 1 | 1 (3%) | 4 | 0 | 3 | 7 (23%)  | 14 | 2 | 7  | 23 (74%)  | 31 |
|                                                 | 31. Address                                      | 0 | 0 | 1 | 1 (3%) | 5 | 3 | 4 | 11 (35%) | 8  | 3 | 8  | 19 (61%)  | 31 |
|                                                 | 32. Funding source for admission                 | 0 | 1 | 1 | 2 (6%) | 3 | 1 | 7 | 11 (35%) | 9  | 3 | 6  | 18 (58%)  | 31 |
|                                                 | 33. Weight                                       | 0 | 0 | 0 | 0 (0%) | 5 | 3 | 5 | 13 (42%) | 12 | 0 | 6  | 18 (58%)  | 31 |
|                                                 | 34. Ethnicity                                    | 0 | 0 | 2 | 2 (6%) | 3 | 3 | 6 | 12 (39%) | 8  | 2 | 7  | 17 (55%)  | 31 |
|                                                 | 35. Socioeconomic status                         | 0 | 0 | 2 | 2 (6%) | 4 | 3 | 7 | 13 (42%) | 9  | 0 | 7  | 16 (52%)  | 31 |

## SUPPLEMENTARY MATERIAL

|                                                                                                                |                                                                                             |          |          |          |               |          |          |          |               |           |          |           |                 |           |
|----------------------------------------------------------------------------------------------------------------|---------------------------------------------------------------------------------------------|----------|----------|----------|---------------|----------|----------|----------|---------------|-----------|----------|-----------|-----------------|-----------|
|                                                                                                                | 36. Marital status                                                                          | 0        | 0        | 4        | 4 (13%)       | 5        | 2        | 5        | 12 (39%)      | 9         | 0        | 6         | 15 (48%)        | 31        |
|                                                                                                                | 37. Children                                                                                | 0        | 0        | 3        | 3 (9%)        | 4        | 3        | 6        | 13 (42%)      | 8         | 0        | 7         | 15 (48%)        | 31        |
|                                                                                                                | 38. Country of birth                                                                        | 0        | 1        | 1        | 2 (6%)        | 2        | 5        | 9        | 16 (52%)      | 6         | 2        | 5         | 13 (42%)        | 31        |
| Client –<br>Premorbid<br>health,<br>functional<br>and<br>community<br>participation<br>information/h<br>istory | <b>39. Preadmission<br/>living situation<br/>(e.g., alone/with<br/>others)</b>              | <b>0</b> | <b>0</b> | <b>0</b> | <b>0 (0%)</b> | <b>0</b> | <b>0</b> | <b>1</b> | <b>1 (3%)</b> | <b>12</b> | <b>3</b> | <b>15</b> | <b>30 (97%)</b> | <b>31</b> |
|                                                                                                                | <b>40. Sensory<br/>impairments<br/>(hearing, vision<br/>etc)</b>                            | <b>0</b> | <b>0</b> | <b>0</b> | <b>0 (0%)</b> | <b>0</b> | <b>1</b> | <b>1</b> | <b>2 (6%)</b> | <b>10</b> | <b>5</b> | <b>14</b> | <b>29 (94%)</b> | <b>31</b> |
|                                                                                                                | <b>41. Existing<br/>family/carer<br/>supports<br/>available</b>                             | <b>0</b> | <b>0</b> | <b>0</b> | <b>0 (0%)</b> | <b>1</b> | <b>1</b> | <b>0</b> | <b>2 (6%)</b> | <b>13</b> | <b>5</b> | <b>11</b> | <b>29 (94%)</b> | <b>31</b> |
|                                                                                                                | <b>42. Premorbid level<br/>of<br/>function/mobility<br/>/activities of daily<br/>living</b> | <b>0</b> | <b>0</b> | <b>0</b> | <b>0 (0%)</b> | <b>0</b> | <b>1</b> | <b>1</b> | <b>2 (6%)</b> | <b>13</b> | <b>4</b> | <b>12</b> | <b>29 (94%)</b> | <b>31</b> |
|                                                                                                                | <b>43. Premorbid<br/>communication</b>                                                      | <b>0</b> | <b>0</b> | <b>0</b> | <b>0 (0%)</b> | <b>1</b> | <b>1</b> | <b>0</b> | <b>2 (6%)</b> | <b>15</b> | <b>2</b> | <b>12</b> | <b>29 (94%)</b> | <b>31</b> |

## SUPPLEMENTARY MATERIAL

|                                                    |   |   |   |        |   |   |   |         |    |   |    |          |    |
|----------------------------------------------------|---|---|---|--------|---|---|---|---------|----|---|----|----------|----|
| 44. Medical/health history                         | 0 | 0 | 0 | 0 (0%) | 0 | 2 | 1 | 3 (10%) | 9  | 5 | 14 | 28 (90%) | 31 |
| 45. Medications                                    | 0 | 0 | 0 | 0 (0%) | 2 | 1 | 1 | 4 (13%) | 7  | 4 | 16 | 27 (87%) | 31 |
| 46. Psychosocial history                           | 0 | 0 | 0 | 0 (0%) | 2 | 0 | 3 | 5 (16%) | 11 | 6 | 9  | 26 (84%) | 31 |
| 47. Existing community supports/social connections | 0 | 0 | 0 | 0 (0%) | 0 | 1 | 4 | 5 (16%) | 13 | 3 | 10 | 26 (84%) | 31 |
| 48. Premorbid level of community participation     | 0 | 0 | 0 | 0 (0%) | 4 | 0 | 1 | 5 (16%) | 11 | 7 | 8  | 26 (84%) | 31 |
| 49. Drug and alcohol history                       | 0 | 0 | 0 | 0 (0%) | 1 | 2 | 3 | 6 (19%) | 11 | 4 | 10 | 25 (81%) | 31 |
| 50. Premorbid history                              | 0 | 0 | 0 | 0 (0%) | 1 | 1 | 4 | 6 (19%) | 12 | 4 | 9  | 25 (81%) | 31 |
| 51. Employment/income status and vocation          | 0 | 0 | 1 | 1 (3%) | 1 | 0 | 4 | 5 (16%) | 12 | 3 | 10 | 25 (81%) | 31 |
| 52. Preadmission care/ community services          | 0 | 0 | 0 | 0 (0%) | 2 | 0 | 4 | 6 (19%) | 10 | 6 | 9  | 25 (81%) | 31 |

## SUPPLEMENTARY MATERIAL

|                                                    |   |   |   |        |   |   |   |          |    |   |    |          |    |
|----------------------------------------------------|---|---|---|--------|---|---|---|----------|----|---|----|----------|----|
| 53. Ability to travel/access transport to services | 0 | 0 | 0 | 0 (0%) | 1 | 1 | 5 | 7 (23%)  | 12 | 5 | 7  | 24 (77%) | 31 |
| 54. Driving status                                 | 0 | 0 | 0 | 0 (0%) | 1 | 1 | 5 | 7 (23%)  | 9  | 3 | 12 | 24 (77%) | 31 |
| 55. Preadmission responsibilities                  | 0 | 0 | 0 | 0 (0%) | 2 | 0 | 7 | 9 (29%)  | 9  | 6 | 7  | 22 (71%) | 31 |
| 56. Existing home modifications/layout             | 0 | 0 | 0 | 0 (0%) | 4 | 1 | 5 | 10 (32%) | 9  | 2 | 10 | 21 (68%) | 31 |
| 57. My Aged Care referrals/assessments             | 0 | 0 | 0 | 0 (0%) | 2 | 0 | 8 | 10 (32%) | 5  | 8 | 8  | 21 (68%) | 31 |
| 58. Nutrition status                               | 0 | 1 | 1 | 2 (6%) | 3 | 0 | 6 | 9 (29%)  | 9  | 3 | 8  | 20 (65%) | 31 |
| 59. Access to care and clinic                      | 0 | 0 | 0 | 0 (0%) | 4 | 4 | 4 | 12 (39%) | 8  | 4 | 7  | 19 (61%) | 31 |
| 60. Previously received rehab                      | 0 | 0 | 0 | 0 (0%) | 1 | 5 | 6 | 12 (39%) | 12 | 3 | 4  | 19 (61%) | 31 |
| 61. Previous hospital admissions                   | 0 | 0 | 0 | 0 (0%) | 5 | 2 | 5 | 12 (39%) | 6  | 8 | 5  | 19 (61%) | 31 |



## SUPPLEMENTARY MATERIAL

|                                                                                                  |                                                                         |          |          |          |               |          |          |          |                 |           |          |           |                  |           |
|--------------------------------------------------------------------------------------------------|-------------------------------------------------------------------------|----------|----------|----------|---------------|----------|----------|----------|-----------------|-----------|----------|-----------|------------------|-----------|
|                                                                                                  | <b>62. Hobbies, interests or other activity goals</b>                   | <b>1</b> | <b>0</b> | <b>1</b> | <b>2 (6%)</b> | <b>2</b> | <b>1</b> | <b>7</b> | <b>10 (32%)</b> | <b>8</b>  | <b>4</b> | <b>7</b>  | <b>19 (61%)</b>  | <b>31</b> |
|                                                                                                  | <b>63. Intent of return to work</b>                                     | <b>0</b> | <b>0</b> | <b>0</b> | <b>0 (0%)</b> | <b>2</b> | <b>2</b> | <b>8</b> | <b>12 (39%)</b> | <b>7</b>  | <b>2</b> | <b>10</b> | <b>19 (61%)</b>  | <b>31</b> |
|                                                                                                  | <b>64. Usual diet</b>                                                   | <b>0</b> | <b>1</b> | <b>1</b> | <b>2 (6%)</b> | <b>4</b> | <b>2</b> | <b>5</b> | <b>11 (35%)</b> | <b>9</b>  | <b>2</b> | <b>7</b>  | <b>18 (58%)</b>  | <b>31</b> |
|                                                                                                  | <b>65. Family history</b>                                               | <b>0</b> | <b>0</b> | <b>1</b> | <b>1 (3%)</b> | <b>3</b> | <b>2</b> | <b>8</b> | <b>13 (42%)</b> | <b>8</b>  | <b>4</b> | <b>5</b>  | <b>17 (55%)</b>  | <b>31</b> |
| Client – Premorbid health/QOL rating, Admission information and Current diagnosis and impairment | <b>66. Primary diagnosis/ Presenting complaint/ reason for referral</b> | <b>0</b> | <b>0</b> | <b>0</b> | <b>0 (0%)</b> | <b>0</b> | <b>0</b> | <b>0</b> | <b>0 (0.0%)</b> | <b>11</b> | <b>3</b> | <b>17</b> | <b>31 (100%)</b> | <b>31</b> |
|                                                                                                  | <b>67. Level of function/mobility /Activities of daily living</b>       | <b>0</b> | <b>0</b> | <b>0</b> | <b>0 (0%)</b> | <b>0</b> | <b>0</b> | <b>0</b> | <b>0 (0%)</b>   | <b>14</b> | <b>6</b> | <b>11</b> | <b>31 (100%)</b> | <b>31</b> |
|                                                                                                  | <b>68. Date and time of admission</b>                                   | <b>0</b> | <b>0</b> | <b>0</b> | <b>0 (0%)</b> | <b>1</b> | <b>0</b> | <b>0</b> | <b>1 (3%)</b>   | <b>14</b> | <b>4</b> | <b>12</b> | <b>30 (97%)</b>  | <b>31</b> |
|                                                                                                  | <b>69. Impairment (including severity)</b>                              | <b>0</b> | <b>0</b> | <b>0</b> | <b>0 (0%)</b> | <b>0</b> | <b>0</b> | <b>1</b> | <b>1 (3%)</b>   | <b>11</b> | <b>6</b> | <b>13</b> | <b>30 (97%)</b>  | <b>31</b> |

## SUPPLEMENTARY MATERIAL

|                                                                      |   |   |   |        |   |   |   |         |    |    |    |          |    |
|----------------------------------------------------------------------|---|---|---|--------|---|---|---|---------|----|----|----|----------|----|
| 70. Date of onset/time since diagnosis                               | 0 | 0 | 0 | 0 (0%) | 0 | 1 | 0 | 1 (3%)  | 10 | 5  | 15 | 30 (97%) | 31 |
| 71. Cognitive impairment                                             | 0 | 0 | 0 | 0 (0%) | 1 | 0 | 2 | 3 (10%) | 8  | 7  | 13 | 28 (90%) | 31 |
| 72. Communication impairment                                         | 0 | 0 | 0 | 0 (0%) | 1 | 0 | 2 | 3 (10%) | 10 | 7  | 11 | 28 (90%) | 31 |
| 73. Risk of clinical incidents (e.g. falls, malnutrition)            | 0 | 0 | 0 | 0 (0%) | 2 | 0 | 1 | 3 (10%) | 11 | 7  | 10 | 28 (90%) | 31 |
| 74. Dysphagia, need for modified diet                                | 0 | 0 | 0 | 0 (0%) | 1 | 0 | 3 | 4 (13%) | 11 | 3  | 13 | 27 (87%) | 31 |
| 75. Rehabilitation complexity                                        | 0 | 0 | 1 | 1 (3%) | 1 | 2 | 1 | 4 (13%) | 14 | 6  | 6  | 26 (84%) | 31 |
| 76. Wellbeing/worry/anxiety                                          | 0 | 0 | 0 | 0 (0%) | 0 | 0 | 6 | 6 (19%) | 9  | 10 | 6  | 25 (81%) | 31 |
| 77. Health-related Quality of life                                   | 0 | 0 | 0 | 0 (0%) | 1 | 1 | 5 | 7 (23%) | 9  | 6  | 9  | 24 (77%) | 31 |
| 78. Australian National Sub-acute and Non-Acute Patient (AN-SNAP) of | 1 | 0 | 1 | 2 (6%) | 1 | 1 | 4 | 6 (19%) | 14 | 3  | 6  | 23 (74%) | 31 |

## SUPPLEMENTARY MATERIAL

|     |                                                         |   |   |   |         |   |   |    |          |    |   |    |          |    |  |
|-----|---------------------------------------------------------|---|---|---|---------|---|---|----|----------|----|---|----|----------|----|--|
|     | <b>rehabilitation admission</b>                         |   |   |   |         |   |   |    |          |    |   |    |          |    |  |
| 79. | <b>Decision-making capacity</b>                         | 0 | 0 | 1 | 1 (3%)  | 2 | 1 | 4  | 7 (23%)  | 7  | 3 | 13 | 23 (74%) | 31 |  |
| 80. | <b>Behaviour challenges</b>                             | 0 | 0 | 0 | 0 (0%)  | 1 | 1 | 6  | 8 (26%)  | 9  | 5 | 9  | 23 (74%) | 31 |  |
| 81. | <b>Condition complexity</b>                             | 0 | 0 | 0 | 0 (0%)  | 2 | 1 | 5  | 8 (26%)  | 11 | 7 | 5  | 23 (74%) | 31 |  |
| 82. | <b>Where/who client was referred from</b>               | 0 | 0 | 1 | 1 (3%)  | 2 | 1 | 5  | 8 (26%)  | 11 | 2 | 9  | 22 (71%) | 31 |  |
| 83. | <b>Diagnosis-related group (DRG) of acute admission</b> | 1 | 0 | 2 | 3 (10%) | 1 | 2 | 6  | 9 (29%)  | 9  | 2 | 8  | 19 (61%) | 31 |  |
| 84. | <b>Frailty</b>                                          | 1 | 0 | 0 | 1 (3%)  | 0 | 2 | 9  | 11 (35%) | 9  | 2 | 8  | 19 (61%) | 31 |  |
| 85. | <b>Satisfaction with usual living situation</b>         | 0 | 0 | 0 | 0 (0%)  | 4 | 2 | 9  | 15 (48%) | 9  | 4 | 3  | 16 (52%) | 31 |  |
| 86. | <b>Satisfaction with pre-morbid function</b>            | 0 | 0 | 0 | 0 (0%)  | 4 | 3 | 10 | 17 (55%) | 7  | 5 | 2  | 14 (45%) | 31 |  |

## SUPPLEMENTARY MATERIAL

|                                                                         |                                                                                                          |          |          |          |               |          |          |          |                |           |           |           |                  |           |
|-------------------------------------------------------------------------|----------------------------------------------------------------------------------------------------------|----------|----------|----------|---------------|----------|----------|----------|----------------|-----------|-----------|-----------|------------------|-----------|
| Client – Participation, discharge/ post care related information, other | <b>87. Ongoing post-discharge care requirements</b>                                                      | <b>0</b> | <b>0</b> | <b>0</b> | <b>0 (0%)</b> | <b>0</b> | <b>0</b> | <b>0</b> | <b>0 (0%)</b>  | <b>17</b> | <b>2</b>  | <b>11</b> | <b>30 (100%)</b> | <b>30</b> |
|                                                                         | <b>88. Discharge destination</b>                                                                         | <b>0</b> | <b>0</b> | <b>0</b> | <b>0 (0%)</b> | <b>0</b> | <b>0</b> | <b>1</b> | <b>1 (3%)</b>  | <b>11</b> | <b>4</b>  | <b>14</b> | <b>29 (97%)</b>  | <b>30</b> |
|                                                                         | <b>89. Need for carer/caregiver</b>                                                                      | <b>0</b> | <b>0</b> | <b>0</b> | <b>0 (0%)</b> | <b>0</b> | <b>0</b> | <b>1</b> | <b>1 (3%)</b>  | <b>12</b> | <b>5</b>  | <b>12</b> | <b>29 (97%)</b>  | <b>30</b> |
|                                                                         | <b>90. Need for services post-discharge</b>                                                              | <b>0</b> | <b>0</b> | <b>0</b> | <b>0 (0%)</b> | <b>0</b> | <b>1</b> | <b>0</b> | <b>1 (3%)</b>  | <b>14</b> | <b>2</b>  | <b>13</b> | <b>29 (97%)</b>  | <b>30</b> |
|                                                                         | <b>91. Rehabilitation goals e.g. Goal Attainment Scaling</b>                                             | <b>0</b> | <b>0</b> | <b>0</b> | <b>0 (0%)</b> | <b>1</b> | <b>1</b> | <b>0</b> | <b>2 (7%)</b>  | <b>14</b> | <b>4</b>  | <b>10</b> | <b>28 (93%)</b>  | <b>30</b> |
|                                                                         | <b>92. Date of discharge from unit/hospital</b>                                                          | <b>0</b> | <b>0</b> | <b>0</b> | <b>0 (0%)</b> | <b>1</b> | <b>0</b> | <b>1</b> | <b>2 (7%)</b>  | <b>11</b> | <b>4</b>  | <b>13</b> | <b>28 (93%)</b>  | <b>30</b> |
|                                                                         | <b>93. Referral to other services / Services accessed when no longer receiving active rehabilitation</b> | <b>0</b> | <b>0</b> | <b>0</b> | <b>0 (0%)</b> | <b>1</b> | <b>0</b> | <b>5</b> | <b>6 (20%)</b> | <b>10</b> | <b>5</b>  | <b>9</b>  | <b>24 (80%)</b>  | <b>30</b> |
|                                                                         | <b>94. Participation</b>                                                                                 | <b>0</b> | <b>0</b> | <b>0</b> | <b>0 (0%)</b> | <b>1</b> | <b>1</b> | <b>5</b> | <b>7 (23%)</b> | <b>10</b> | <b>10</b> | <b>3</b>  | <b>23 (77%)</b>  | <b>30</b> |

## SUPPLEMENTARY MATERIAL

|                                                         |   |   |   |         |   |   |    |          |    |   |   |          |    |
|---------------------------------------------------------|---|---|---|---------|---|---|----|----------|----|---|---|----------|----|
| 95. Discharge barriers                                  | 0 | 0 | 1 | 1 (3%)  | 1 | 1 | 4  | 6 (20%)  | 8  | 6 | 9 | 23 (77%) | 30 |
| 96. Client expectations                                 | 0 | 0 | 1 | 1 (3%)  | 1 | 1 | 6  | 8 (27%)  | 11 | 5 | 5 | 21 (70%) | 30 |
| 97. New residential aged care facility (RACF) admission | 0 | 0 | 0 | 0 (0%)  | 2 | 0 | 7  | 9 (30%)  | 9  | 3 | 9 | 21 (70%) | 30 |
| 98. Driving instruction on discharge                    | 0 | 0 | 0 | 0 (0%)  | 2 | 1 | 7  | 10 (33%) | 7  | 5 | 8 | 20 (67%) | 30 |
| 99. Discharge summary completion on time                | 2 | 0 | 1 | 3 (10%) | 2 | 0 | 6  | 8 (27%)  | 7  | 5 | 7 | 19 (63%) | 30 |
| 100. Motivation                                         | 0 | 0 | 2 | 2 (7%)  | 2 | 0 | 8  | 10 (33%) | 6  | 8 | 4 | 18 (60%) | 30 |
| 101. Patient ability to identify goals                  | 0 | 0 | 0 | 0 (0%)  | 3 | 1 | 10 | 14 (47%) | 9  | 4 | 3 | 16 (53%) | 30 |
| 102. Advanced care planning                             | 0 | 0 | 0 | 0 (0%)  | 2 | 2 | 10 | 14 (47%) | 5  | 3 | 8 | 16 (53%) | 30 |
| 103. Compliance                                         | 1 | 0 | 1 | 2 (7%)  | 5 | 0 | 8  | 13 (43%) | 6  | 7 | 2 | 15 (50%) | 30 |

## SUPPLEMENTARY MATERIAL

|                                                          |                                                                  |          |          |          |               |          |          |           |                 |           |          |          |                 |           |
|----------------------------------------------------------|------------------------------------------------------------------|----------|----------|----------|---------------|----------|----------|-----------|-----------------|-----------|----------|----------|-----------------|-----------|
|                                                          | 104. <b>Satisfaction with discharge destination</b>              | <b>0</b> | <b>0</b> | <b>0</b> | <b>0 (0%)</b> | <b>3</b> | <b>2</b> | <b>10</b> | <b>15 (50%)</b> | <b>10</b> | <b>4</b> | <b>1</b> | <b>15 (50%)</b> | <b>30</b> |
|                                                          | 105. Participation in research projects                          | 0        | 0        | 2        | 2 (7%)        | 4        | 3        | 10        | 17 (57%)        | 6         | 1        | 4        | 11 (37%)        | 30        |
| Caregiver – Caregiver demographic and health information | 106. <b>Relationship to client</b>                               | <b>0</b> | <b>0</b> | <b>0</b> | <b>0 (0%)</b> | <b>1</b> | <b>2</b> | <b>1</b>  | <b>4 (13%)</b>  | <b>15</b> | <b>4</b> | <b>7</b> | <b>26 (87%)</b> | <b>30</b> |
|                                                          | 107. <b>Level of involvement including frequency of contact</b>  | <b>0</b> | <b>0</b> | <b>0</b> | <b>0 (0%)</b> | <b>1</b> | <b>1</b> | <b>4</b>  | <b>6 (20%)</b>  | <b>14</b> | <b>4</b> | <b>6</b> | <b>24 (80%)</b> | <b>30</b> |
|                                                          | 108. <b>Living arrangement (i.e. with client, how far away)</b>  | <b>0</b> | <b>0</b> | <b>0</b> | <b>0 (0%)</b> | <b>3</b> | <b>2</b> | <b>2</b>  | <b>7 (23%)</b>  | <b>15</b> | <b>2</b> | <b>6</b> | <b>23 (77%)</b> | <b>30</b> |
|                                                          | 109. <b>Health issues that impact on ability to provide care</b> | <b>0</b> | <b>0</b> | <b>0</b> | <b>0 (0%)</b> | <b>1</b> | <b>1</b> | <b>6</b>  | <b>8 (27%)</b>  | <b>14</b> | <b>4</b> | <b>4</b> | <b>22 (73%)</b> | <b>30</b> |
|                                                          | 110. <b>Language</b>                                             | <b>0</b> | <b>0</b> | <b>1</b> | <b>1 (3%)</b> | <b>2</b> | <b>4</b> | <b>3</b>  | <b>9 (30%)</b>  | <b>11</b> | <b>5</b> | <b>4</b> | <b>20 (67%)</b> | <b>30</b> |
|                                                          | 111. <b>Rating of sense of</b>                                   | <b>0</b> | <b>0</b> | <b>1</b> | <b>1 (3%)</b> | <b>3</b> | <b>3</b> | <b>5</b>  | <b>11 (37%)</b> | <b>10</b> | <b>6</b> | <b>2</b> | <b>18 (60%)</b> | <b>30</b> |

## SUPPLEMENTARY MATERIAL

|                                             |                                                                |          |          |          |                |          |          |          |                 |           |          |          |                 |           |
|---------------------------------------------|----------------------------------------------------------------|----------|----------|----------|----------------|----------|----------|----------|-----------------|-----------|----------|----------|-----------------|-----------|
|                                             | <b>wellbeing/worry/<br/>anxiety</b>                            |          |          |          |                |          |          |          |                 |           |          |          |                 |           |
|                                             | 112. <b>Employment,<br/>hours of work</b>                      | <b>0</b> | <b>0</b> | <b>0</b> | <b>0 (0%)</b>  | <b>1</b> | <b>6</b> | <b>6</b> | <b>13 (43%)</b> | <b>13</b> | <b>2</b> | <b>2</b> | <b>17 (57%)</b> | <b>30</b> |
|                                             | 113. <b>Age</b>                                                | <b>0</b> | <b>1</b> | <b>2</b> | <b>3 (10%)</b> | <b>0</b> | <b>4</b> | <b>6</b> | <b>10 (33%)</b> | <b>10</b> | <b>1</b> | <b>6</b> | <b>17 (57%)</b> | <b>30</b> |
|                                             | 114. Rating of own<br>health                                   | 0        | 2        | 0        | 2 (7%)         | 6        | 1        | 8        | 15 (50%)        | 8         | 4        | 1        | 13 (43%)        | 30        |
|                                             | 115. Mental health                                             | 0        | 0        | 1        | 1 (3%)         | 5        | 7        | 4        | 16 (53%)        | 6         | 5        | 2        | 13 (43%)        | 30        |
|                                             | 116. Sex/gender                                                | 0        | 1        | 5        | 6 (20%)        | 4        | 4        | 4        | 12 (40%)        | 7         | 2        | 3        | 12 (40%)        | 30        |
|                                             | 117. Social<br>participation                                   | 0        | 0        | 3        | 3 (10%)        | 3        | 8        | 6        | 17 (57%)        | 7         | 2        | 1        | 10 (33%)        | 30        |
|                                             | 118. Health history                                            | 0        | 0        | 4        | 4 (13%)        | 5        | 8        | 6        | 19 (63%)        | 2         | 3        | 2        | 7 (23%)         | 30        |
|                                             | 119. Ethnicity                                                 | 0        | 1        | 5        | 6 (20%)        | 3        | 8        | 8        | 19 (63%)        | 3         | 1        | 1        | 5 (17%)         | 30        |
| Caregiver –<br>Capacity to<br>provide care, | 120. <b>Capacity to<br/>provide care<br/>(e.g., logistics,</b> | <b>0</b> | <b>0</b> | <b>0</b> | <b>0 (0%)</b>  | <b>1</b> | <b>2</b> | <b>2</b> | <b>5 (17%)</b>  | <b>15</b> | <b>3</b> | <b>7</b> | <b>25 (83%)</b> | <b>30</b> |

## SUPPLEMENTARY MATERIAL

|                                                       |                                                                                               |          |          |               |               |          |          |                |                |           |          |                 |                 |           |  |
|-------------------------------------------------------|-----------------------------------------------------------------------------------------------|----------|----------|---------------|---------------|----------|----------|----------------|----------------|-----------|----------|-----------------|-----------------|-----------|--|
| supports available, living situation and expectations | <b>transport, emotional)</b>                                                                  |          |          |               |               |          |          |                |                |           |          |                 |                 |           |  |
|                                                       | <b>121. Barriers to care (e.g. financial, logistics, transport, emotions, work, children)</b> | <b>0</b> | <b>0</b> | <b>0</b>      | <b>0 (0%)</b> | <b>3</b> | <b>1</b> | <b>2</b>       | <b>6 (20%)</b> | <b>16</b> | <b>2</b> | <b>6</b>        | <b>24 (80%)</b> | <b>30</b> |  |
|                                                       | <b>122. Communication barriers</b>                                                            | <b>0</b> | <b>0</b> | <b>0</b>      | <b>0 (0%)</b> | <b>3</b> | <b>0</b> | <b>4</b>       | <b>7 (23%)</b> | <b>18</b> | <b>3</b> | <b>2</b>        | <b>23 (77%)</b> | <b>30</b> |  |
|                                                       | <b>123. Access to support (services, family, community, respite)</b>                          | <b>0</b> | <b>0</b> | <b>1</b>      | <b>1 (3%)</b> | <b>2</b> | <b>1</b> | <b>4</b>       | <b>7 (23%)</b> | <b>16</b> | <b>2</b> | <b>4</b>        | <b>22 (73%)</b> | <b>30</b> |  |
|                                                       | <b>124. Home living situation</b>                                                             | <b>0</b> | <b>0</b> | <b>1</b>      | <b>1 (3%)</b> | <b>2</b> | <b>2</b> | <b>3</b>       | <b>7 (23%)</b> | <b>15</b> | <b>3</b> | <b>4</b>        | <b>22 (73%)</b> | <b>30</b> |  |
|                                                       | <b>125. Family expectations/goals of rehabilitation</b>                                       | <b>0</b> | <b>0</b> | <b>0</b>      | <b>0 (0%)</b> | <b>3</b> | <b>1</b> | <b>4</b>       | <b>8 (27%)</b> | <b>12</b> | <b>7</b> | <b>3</b>        | <b>22 (73%)</b> | <b>30</b> |  |
|                                                       | <b>126. Willingness/capacity to learn</b>                                                     | <b>0</b> | <b>0</b> | <b>1</b>      | <b>1 (3%)</b> | <b>4</b> | <b>2</b> | <b>3</b>       | <b>9 (30%)</b> | <b>16</b> | <b>2</b> | <b>2</b>        | <b>20 (67%)</b> | <b>30</b> |  |
| <b>127. Usual residence</b>                           | <b>0</b>                                                                                      | <b>1</b> | <b>0</b> | <b>1 (3%)</b> | <b>4</b>      | <b>3</b> | <b>2</b> | <b>9 (30%)</b> | <b>15</b>      | <b>2</b>  | <b>3</b> | <b>20 (67%)</b> | <b>30</b>       |           |  |



## SUPPLEMENTARY MATERIAL

|                                                            |                                                                                                     |   |   |   |        |   |   |   |          |    |   |   |          |    |
|------------------------------------------------------------|-----------------------------------------------------------------------------------------------------|---|---|---|--------|---|---|---|----------|----|---|---|----------|----|
|                                                            | 128. Rating of confidence in care role                                                              | 0 | 1 | 0 | 1 (3%) | 3 | 2 | 5 | 10 (33%) | 14 | 3 | 2 | 19 (63%) | 30 |
|                                                            | 129. Level of burden                                                                                | 0 | 0 | 0 | 0 (0%) | 4 | 1 | 7 | 12 (40%) | 11 | 5 | 2 | 18 (60%) | 30 |
|                                                            | 130. Understanding of rehabilitation                                                                | 0 | 0 | 2 | 2 (7%) | 3 | 3 | 6 | 12 (40%) | 13 | 3 | 0 | 16 (53%) | 30 |
|                                                            | 131. Receipt of financial support as carer                                                          | 0 | 0 | 1 | 1 (3%) | 2 | 6 | 6 | 14 (47%) | 12 | 1 | 2 | 15 (50%) | 30 |
| Service delivery and interventions                         |                                                                                                     |   |   |   |        |   |   |   |          |    |   |   |          |    |
| Intervention/<br>Service delivery –<br>General information | 132. Mode of delivery (e.g., telehealth vs face to face)                                            | 0 | 0 | 0 | 0 (0%) | 0 | 0 | 2 | 2 (7%)   | 16 | 2 | 9 | 27 (93%) | 29 |
|                                                            | 133. Type of intervention (assessment, treatment, education, counselling, self-management, support) | 0 | 0 | 0 | 0 (0%) | 0 | 0 | 5 | 5 (17%)  | 9  | 6 | 9 | 24 (83%) | 29 |
|                                                            | 134. Service delivery model                                                                         | 0 | 0 | 0 | 0 (0%) | 0 | 0 | 5 | 5 (17%)  | 12 | 5 | 7 | 24 (83%) | 29 |

## SUPPLEMENTARY MATERIAL

|      |                                                                                                              |   |   |   |        |   |   |   |         |    |   |   |          |    |
|------|--------------------------------------------------------------------------------------------------------------|---|---|---|--------|---|---|---|---------|----|---|---|----------|----|
|      | <b>(e.g. individual, group)</b>                                                                              |   |   |   |        |   |   |   |         |    |   |   |          |    |
| 135. | <b>Occasions of service</b>                                                                                  | 0 | 0 | 0 | 0 (0%) | 1 | 1 | 3 | 5 (17%) | 13 | 4 | 7 | 24 (83%) | 29 |
| 136. | <b>Duration and length of intervention</b>                                                                   | 0 | 0 | 0 | 0 (0%) | 0 | 0 | 6 | 6 (21%) | 13 | 5 | 5 | 23 (79%) | 29 |
| 137. | <b>Frequency of intervention</b>                                                                             | 0 | 0 | 0 | 0 (0%) | 1 | 1 | 4 | 6 (21%) | 13 | 3 | 7 | 23 (79%) | 29 |
| 138. | <b>Date of intervention</b>                                                                                  | 0 | 0 | 0 | 0 (0%) | 0 | 1 | 5 | 6 (21%) | 12 | 2 | 9 | 23 (79%) | 29 |
| 139. | <b>Whether intervention match patient goals</b>                                                              | 0 | 0 | 1 | 1 (3%) | 3 | 2 | 0 | 5 (17%) | 14 | 5 | 4 | 23 (79%) | 29 |
| 140. | <b>Dose / Intensity of treatment</b>                                                                         | 0 | 0 | 0 | 0 (0%) | 1 | 2 | 4 | 7 (24%) | 12 | 3 | 7 | 22 (76%) | 29 |
| 141. | <b>Barriers to intervention (including factors impacting ability to provide desired treatment intensity)</b> | 0 | 0 | 0 | 0 (0%) | 2 | 0 | 5 | 7 (24%) | 13 | 6 | 3 | 22 (76%) | 29 |

## SUPPLEMENTARY MATERIAL

|                                                                      |   |   |   |         |   |   |    |          |    |   |   |          |    |
|----------------------------------------------------------------------|---|---|---|---------|---|---|----|----------|----|---|---|----------|----|
| 142. Adherence to treatment                                          | 0 | 0 | 0 | 0 (0%)  | 1 | 1 | 5  | 7 (24%)  | 13 | 5 | 4 | 22 (76%) | 29 |
| 143. Major clinical reasoning decisions for treatment plan or change | 1 | 0 | 0 | 1 (3%)  | 2 | 3 | 3  | 8 (28%)  | 12 | 2 | 6 | 20 (69%) | 29 |
| 144. Total therapy sessions                                          | 0 | 0 | 0 | 0 (0%)  | 2 | 2 | 7  | 11 (38%) | 10 | 3 | 5 | 18 (62%) | 29 |
| 145. Changes to therapy                                              | 0 | 1 | 0 | 1 (3%)  | 3 | 1 | 7  | 11 (38%) | 12 | 3 | 2 | 17 (59%) | 29 |
| 146. Non-pharm treatment                                             | 1 | 0 | 0 | 1 (3%)  | 3 | 4 | 5  | 12 (41%) | 9  | 5 | 2 | 16 (55%) | 29 |
| 147. Aim of the session                                              | 1 | 0 | 1 | 2 (7%)  | 4 | 3 | 4  | 11 (38%) | 12 | 2 | 2 | 16 (55%) | 29 |
| 148. Received weekend service                                        | 1 | 1 | 1 | 3 (10%) | 2 | 3 | 6  | 11 (38%) | 9  | 4 | 2 | 15 (52%) | 29 |
| 149. What was done in session                                        | 0 | 0 | 0 | 0 (0%)  | 6 | 2 | 7  | 15 (52%) | 9  | 3 | 2 | 14 (48%) | 29 |
| 150. Involvement of recreation activities                            | 0 | 0 | 0 | 0 (0%)  | 4 | 4 | 10 | 18 (62%) | 7  | 3 | 1 | 11 (38%) | 29 |

## SUPPLEMENTARY MATERIAL

|                                                                                                               |                                                                                                                                                 |   |   |   |        |   |   |   |         |    |   |    |          |    |
|---------------------------------------------------------------------------------------------------------------|-------------------------------------------------------------------------------------------------------------------------------------------------|---|---|---|--------|---|---|---|---------|----|---|----|----------|----|
| Intervention/<br>Service<br>delivery –<br>Disciplines/cl<br>inicians,<br>family and<br>patient<br>involvement | 151. <b>Patient goal</b>                                                                                                                        | 0 | 0 | 0 | 0 (0%) | 2 | 1 | 1 | 4 (14%) | 11 | 4 | 10 | 25 (86%) | 29 |
|                                                                                                               | 152. <b>Education<br/>provided to<br/>patient and<br/>caregiver (e.g.,<br/>post discharge<br/>care,<br/>communication<br/>partner training)</b> | 0 | 0 | 2 | 2 (7%) | 1 | 0 | 2 | 3 (10%) | 15 | 5 | 4  | 24 (83%) | 29 |
|                                                                                                               | 153. <b>Care plan<br/>provided to the<br/>patient</b>                                                                                           | 0 | 0 | 0 | 0 (0%) | 0 | 0 | 5 | 5 (17%) | 12 | 3 | 9  | 24 (83%) | 29 |
|                                                                                                               | 154. <b>Medication<br/>assessment prior<br/>to discharge or<br/>need to<br/>implement dose<br/>administration<br/>aid</b>                       | 0 | 0 | 0 | 0 (0%) | 2 | 1 | 4 | 7 (24%) | 13 | 2 | 7  | 22 (76%) | 29 |
|                                                                                                               | 155. <b>Interdisciplin<br/>ary care</b>                                                                                                         | 0 | 0 | 0 | 0 (0%) | 1 | 1 | 6 | 8 (28%) | 12 | 3 | 6  | 21 (72%) | 29 |
|                                                                                                               | 156. <b>Discipline<br/>that performs<br/>intervention<br/>(including<br/>provider of<br/>service e.g.,</b>                                      | 1 | 0 | 0 | 1 (3%) | 1 | 1 | 6 | 8 (28%) | 12 | 4 | 4  | 20 (69%) | 29 |

## SUPPLEMENTARY MATERIAL

|                                                                  |                                                                                    |          |          |          |               |          |          |          |                 |           |          |          |                 |           |  |
|------------------------------------------------------------------|------------------------------------------------------------------------------------|----------|----------|----------|---------------|----------|----------|----------|-----------------|-----------|----------|----------|-----------------|-----------|--|
|                                                                  | <b>professional, allied health assistant, student)</b>                             |          |          |          |               |          |          |          |                 |           |          |          |                 |           |  |
|                                                                  | <b>157. Hours/sessions per day in therapy (across different disciplines)</b>       | <b>0</b> | <b>0</b> | <b>2</b> | <b>2 (7%)</b> | <b>2</b> | <b>1</b> | <b>4</b> | <b>7 (24%)</b>  | <b>14</b> | <b>3</b> | <b>3</b> | <b>20 (69%)</b> | <b>29</b> |  |
|                                                                  | <b>158. Family and/or advocate involvement and support</b>                         | <b>0</b> | <b>0</b> | <b>1</b> | <b>1 (3%)</b> | <b>3</b> | <b>1</b> | <b>4</b> | <b>8 (28%)</b>  | <b>13</b> | <b>4</b> | <b>3</b> | <b>20 (69%)</b> | <b>29</b> |  |
|                                                                  | <b>159. Family meetings</b>                                                        | <b>0</b> | <b>0</b> | <b>0</b> | <b>0 (0%)</b> | <b>2</b> | <b>0</b> | <b>7</b> | <b>9 (31%)</b>  | <b>12</b> | <b>5</b> | <b>3</b> | <b>20 (69%)</b> | <b>29</b> |  |
|                                                                  | <b>160. Hours of intervention provided by discipline</b>                           | <b>1</b> | <b>0</b> | <b>0</b> | <b>1 (3%)</b> | <b>4</b> | <b>1</b> | <b>5</b> | <b>10 (34%)</b> | <b>11</b> | <b>4</b> | <b>3</b> | <b>18 (62%)</b> | <b>29</b> |  |
|                                                                  | <b>161. Case conferences</b>                                                       | <b>0</b> | <b>0</b> | <b>0</b> | <b>0 (0%)</b> | <b>2</b> | <b>4</b> | <b>7</b> | <b>13 (45%)</b> | <b>7</b>  | <b>4</b> | <b>5</b> | <b>16 (55%)</b> | <b>29</b> |  |
| <b>Intervention/ Service delivery – Care plan, resources/cos</b> | <b>162. Post discharge follow-up (e.g., needed or not, with which disciplines)</b> | <b>0</b> | <b>0</b> | <b>0</b> | <b>0 (0%)</b> | <b>0</b> | <b>1</b> | <b>0</b> | <b>1 (3%)</b>   | <b>16</b> | <b>5</b> | <b>7</b> | <b>28 (97%)</b> | <b>29</b> |  |

## SUPPLEMENTARY MATERIAL

|                                                                           |                                                                                          |          |          |          |               |          |          |          |                |           |          |          |                 |           |
|---------------------------------------------------------------------------|------------------------------------------------------------------------------------------|----------|----------|----------|---------------|----------|----------|----------|----------------|-----------|----------|----------|-----------------|-----------|
| t of care,<br>post-<br>discharge and<br>indirect<br>patient<br>activities | 163. <b>Management plan (including discharge plan)</b>                                   | <b>0</b> | <b>0</b> | <b>0</b> | <b>0 (0%)</b> | <b>1</b> | <b>1</b> | <b>0</b> | <b>2 (7%)</b>  | <b>19</b> | <b>3</b> | <b>5</b> | <b>27 (93%)</b> | <b>29</b> |
|                                                                           | 164. <b>Home visits</b>                                                                  | <b>0</b> | <b>0</b> | <b>0</b> | <b>0 (0%)</b> | <b>1</b> | <b>0</b> | <b>3</b> | <b>4 (14%)</b> | <b>15</b> | <b>3</b> | <b>7</b> | <b>25 (86%)</b> | <b>29</b> |
|                                                                           | 165. <b>Future goals at discharge from rehabilitation service</b>                        | <b>0</b> | <b>0</b> | <b>1</b> | <b>1 (3%)</b> | <b>0</b> | <b>0</b> | <b>3</b> | <b>3 (10%)</b> | <b>15</b> | <b>7</b> | <b>3</b> | <b>25 (86%)</b> | <b>29</b> |
|                                                                           | 166. <b>Psychosocial support (e.g., Counselling)</b>                                     | <b>0</b> | <b>0</b> | <b>0</b> | <b>0 (0%)</b> | <b>0</b> | <b>1</b> | <b>4</b> | <b>5 (17%)</b> | <b>11</b> | <b>8</b> | <b>5</b> | <b>24 (83%)</b> | <b>29</b> |
|                                                                           | 167. <b>Instructions for ongoing care (e.g., living situation, social circumstances)</b> | <b>0</b> | <b>0</b> | <b>0</b> | <b>0 (0%)</b> | <b>2</b> | <b>0</b> | <b>3</b> | <b>5 (17%)</b> | <b>16</b> | <b>3</b> | <b>5</b> | <b>24 (83%)</b> | <b>29</b> |
|                                                                           | 168. <b>Level of resources required (e.g., two therapists vs semi supervised)</b>        | <b>0</b> | <b>1</b> | <b>1</b> | <b>2 (7%)</b> | <b>2</b> | <b>1</b> | <b>6</b> | <b>9 (31%)</b> | <b>11</b> | <b>3</b> | <b>4</b> | <b>18 (62%)</b> | <b>29</b> |

## SUPPLEMENTARY MATERIAL

|                                                                                                                                                        |   |   |   |         |   |   |    |          |    |   |   |          |    |
|--------------------------------------------------------------------------------------------------------------------------------------------------------|---|---|---|---------|---|---|----|----------|----|---|---|----------|----|
| 169. Measurement of patient related activities (e.g., writing reports, designing patient specific therapy activities, time spent organising equipment) | 1 | 0 | 1 | 2 (7%)  | 4 | 1 | 4  | 9 (31%)  | 13 | 3 | 2 | 18 (62%) | 29 |
| 170. Equipment and consumables                                                                                                                         | 1 | 0 | 0 | 1 (3%)  | 0 | 5 | 6  | 11 (38%) | 10 | 3 | 4 | 17 (59%) | 29 |
| 171. Technology assisted therapy                                                                                                                       | 0 | 0 | 1 | 1 (3%)  | 2 | 1 | 9  | 12 (41%) | 9  | 4 | 3 | 16 (55%) | 29 |
| 172. Missed appointments and reasons (e.g., staffing limitations, patient compliance)                                                                  | 1 | 1 | 2 | 4 (14%) | 1 | 2 | 7  | 10 (34%) | 9  | 4 | 2 | 15 (52%) | 29 |
| 173. Cost-benefit rating of rehabilitation (e.g., financial outlay, time, inconvenience)                                                               | 1 | 1 | 5 | 7 (24%) | 1 | 5 | 5  | 11 (38%) | 9  | 2 | 0 | 11 (38%) | 29 |
| 174. Time spent moving                                                                                                                                 | 1 | 1 | 2 | 4 (14%) | 2 | 4 | 13 | 19 (66%) | 5  | 1 | 0 | 6 (21%)  | 29 |

## SUPPLEMENTARY MATERIAL

| Outcomes                                                                                                               |                                                                      |   |   |   |        |   |   |   |         |    |   |    |           |    |
|------------------------------------------------------------------------------------------------------------------------|----------------------------------------------------------------------|---|---|---|--------|---|---|---|---------|----|---|----|-----------|----|
| Outcomes – Independence, impairment, activity, participation, quality of life and psychosocial and emotional wellbeing | 175. <b>Level of Independence</b>                                    | 0 | 0 | 0 | 0 (0%) | 0 | 0 | 0 | 0 (0%)  | 15 | 3 | 11 | 29 (100%) | 29 |
|                                                                                                                        | 176. <b>Change in function (e.g., mobility)</b>                      | 0 | 0 | 0 | 0 (0%) | 1 | 0 | 1 | 2 (7%)  | 16 | 3 | 8  | 27 (93%)  | 29 |
|                                                                                                                        | 177. <b>Ability to return to previous roles/functions/activities</b> | 0 | 0 | 0 | 0 (0%) | 0 | 1 | 1 | 2 (7%)  | 13 | 5 | 9  | 27 (93%)  | 29 |
|                                                                                                                        | 178. <b>Activities of daily living</b>                               | 0 | 0 | 0 | 0 (0%) | 0 | 1 | 1 | 2 (7%)  | 14 | 4 | 9  | 27 (93%)  | 29 |
|                                                                                                                        | 179. <b>Quality of Life</b>                                          | 0 | 0 | 0 | 0 (0%) | 0 | 0 | 2 | 2 (7%)  | 14 | 4 | 9  | 27 (93%)  | 29 |
|                                                                                                                        | 180. <b>Psychological wellbeing</b>                                  | 0 | 0 | 0 | 0 (0%) | 0 | 1 | 3 | 4 (14%) | 11 | 5 | 9  | 25 (86%)  | 29 |
|                                                                                                                        | 181. <b>Change in impairment</b>                                     | 0 | 0 | 1 | 1 (3%) | 0 | 0 | 4 | 4 (14%) | 13 | 5 | 6  | 24 (83%)  | 29 |
|                                                                                                                        | 182. <b>Change in diagnosis</b>                                      | 0 | 0 | 1 | 1 (3%) | 0 | 2 | 3 | 5 (17%) | 13 | 4 | 6  | 23 (79%)  | 29 |
|                                                                                                                        | 183. <b>Activity and participation</b>                               | 0 | 0 | 0 | 0 (0%) | 1 | 1 | 4 | 6 (21%) | 15 | 3 | 5  | 23 (79%)  | 29 |



## SUPPLEMENTARY MATERIAL

|                                                                                                                 |                                                                                                          |   |   |   |        |   |   |   |          |    |   |    |          |    |
|-----------------------------------------------------------------------------------------------------------------|----------------------------------------------------------------------------------------------------------|---|---|---|--------|---|---|---|----------|----|---|----|----------|----|
|                                                                                                                 | 184. <b>Community participation</b>                                                                      | 0 | 0 | 0 | 0 (0%) | 0 | 1 | 5 | 6 (21%)  | 13 | 3 | 7  | 23 (79%) | 29 |
|                                                                                                                 | 185. <b>Social wellbeing</b>                                                                             | 0 | 0 | 0 | 0 (0%) | 0 | 1 | 5 | 6 (21%)  | 13 | 5 | 5  | 23 (79%) | 29 |
|                                                                                                                 | 186. <b>Length of time to return to function or change in function</b>                                   | 0 | 0 | 0 | 0 (0%) | 0 | 2 | 5 | 7 (24%)  | 16 | 2 | 4  | 22 (76%) | 29 |
|                                                                                                                 | 187. <b>Emotional response to treatment</b>                                                              | 1 | 0 | 0 | 1 (3%) | 2 | 1 | 8 | 11 (38%) | 13 | 2 | 2  | 17 (59%) | 29 |
| Outcomes – Adverse events, goal attainment, health outcomes, admission/readmission, satisfaction and experience | 188. <b>Complications/Adverse events and impact on rehabilitation outcomes (e.g., falls, infections)</b> | 0 | 0 | 0 | 0 (0%) | 0 | 0 | 2 | 2 (7%)   | 10 | 5 | 12 | 27 (93%) | 29 |
|                                                                                                                 | 189. <b>Goal attainment</b>                                                                              | 0 | 0 | 0 | 0 (0%) | 0 | 1 | 1 | 2 (7%)   | 11 | 6 | 10 | 27 (93%) | 29 |
|                                                                                                                 | 190. <b>Cognition</b>                                                                                    | 0 | 1 | 0 | 1 (3%) | 0 | 0 | 1 | 1 (3%)   | 14 | 6 | 7  | 27 (93%) | 29 |
|                                                                                                                 | 191. <b>Satisfaction with care (e.g., goals attained,</b>                                                | 0 | 0 | 0 | 0 (0%) | 0 | 1 | 1 | 2 (7%)   | 15 | 5 | 7  | 27 (93%) | 29 |

## SUPPLEMENTARY MATERIAL

|      |                                               |          |          |          |               |          |          |          |                |           |          |           |                 |           |
|------|-----------------------------------------------|----------|----------|----------|---------------|----------|----------|----------|----------------|-----------|----------|-----------|-----------------|-----------|
|      | <b>clinician and services)</b>                |          |          |          |               |          |          |          |                |           |          |           |                 |           |
| 192. | <b>Pain</b>                                   | <b>0</b> | <b>0</b> | <b>0</b> | <b>0 (0%)</b> | <b>0</b> | <b>1</b> | <b>2</b> | <b>3 (10%)</b> | <b>15</b> | <b>3</b> | <b>8</b>  | <b>26 (90%)</b> | <b>29</b> |
| 193. | <b>Mortality</b>                              | <b>0</b> | <b>0</b> | <b>0</b> | <b>0 (0%)</b> | <b>0</b> | <b>0</b> | <b>4</b> | <b>4 (14%)</b> | <b>8</b>  | <b>4</b> | <b>13</b> | <b>25 (86%)</b> | <b>29</b> |
| 194. | <b>Reasons why people ceased treatment</b>    | <b>0</b> | <b>0</b> | <b>0</b> | <b>0 (0%)</b> | <b>1</b> | <b>0</b> | <b>3</b> | <b>4 (14%)</b> | <b>18</b> | <b>2</b> | <b>5</b>  | <b>25 (86%)</b> | <b>29</b> |
| 195. | <b>Length of stay in acute/rehabilitation</b> | <b>1</b> | <b>0</b> | <b>1</b> | <b>2 (7%)</b> | <b>0</b> | <b>1</b> | <b>1</b> | <b>2 (7%)</b>  | <b>14</b> | <b>1</b> | <b>10</b> | <b>25 (86%)</b> | <b>29</b> |
| 196. | <b>Readmission</b>                            | <b>0</b> | <b>1</b> | <b>0</b> | <b>1 (3%)</b> | <b>0</b> | <b>0</b> | <b>3</b> | <b>3 (10%)</b> | <b>14</b> | <b>1</b> | <b>10</b> | <b>25 (86%)</b> | <b>29</b> |
| 197. | <b>Dysphagia / specific diet (if any)</b>     | <b>0</b> | <b>0</b> | <b>0</b> | <b>0 (0%)</b> | <b>0</b> | <b>0</b> | <b>5</b> | <b>5 (17%)</b> | <b>12</b> | <b>4</b> | <b>8</b>  | <b>24 (83%)</b> | <b>29</b> |
| 198. | <b>Unmet needs/goals</b>                      | <b>0</b> | <b>0</b> | <b>1</b> | <b>1 (3%)</b> | <b>0</b> | <b>0</b> | <b>5</b> | <b>5 (17%)</b> | <b>16</b> | <b>5</b> | <b>2</b>  | <b>23 (79%)</b> | <b>29</b> |
| 199. | <b>Complaints about services</b>              | <b>0</b> | <b>0</b> | <b>2</b> | <b>2 (7%)</b> | <b>1</b> | <b>1</b> | <b>2</b> | <b>4 (14%)</b> | <b>15</b> | <b>4</b> | <b>4</b>  | <b>23 (79%)</b> | <b>29</b> |

## SUPPLEMENTARY MATERIAL

|                                                                             |   |   |   |         |   |   |   |          |    |   |   |          |    |
|-----------------------------------------------------------------------------|---|---|---|---------|---|---|---|----------|----|---|---|----------|----|
| 200. Patient and family service experience                                  | 0 | 1 | 0 | 1 (3%)  | 1 | 0 | 5 | 6 (21%)  | 11 | 7 | 4 | 22 (76%) | 29 |
| 201. Communication access                                                   | 0 | 0 | 0 | 0 (0%)  | 1 | 1 | 7 | 9 (31%)  | 14 | 3 | 3 | 20 (69%) | 29 |
| 202. Waiting times (for review and admission)                               | 1 | 0 | 0 | 1 (3%)  | 1 | 4 | 4 | 9 (31%)  | 12 | 4 | 3 | 19 (66%) | 29 |
| 203. Changes in episode of care (e.g., Ward transfers due to deterioration) | 1 | 0 | 1 | 2 (7%)  | 1 | 2 | 5 | 8 (28%)  | 15 | 2 | 2 | 19 (66%) | 29 |
| 204. Frailty                                                                | 1 | 0 | 0 | 1 (3%)  | 1 | 1 | 8 | 10 (34%) | 9  | 4 | 5 | 18 (62%) | 29 |
| 205. Compliments                                                            | 0 | 0 | 3 | 3 (10%) | 2 | 2 | 5 | 9 (31%)  | 9  | 2 | 6 | 17 (59%) | 29 |
| 206. Physical access                                                        | 1 | 0 | 2 | 3 (10%) | 1 | 1 | 7 | 9 (31%)  | 12 | 1 | 4 | 17 (59%) | 29 |
| 207. Weight                                                                 | 1 | 0 | 2 | 3 (10%) | 2 | 4 | 4 | 10 (34%) | 10 | 2 | 4 | 16 (55%) | 29 |
| 208. Therapeutic alliance (patient                                          | 0 | 1 | 0 | 1 (3%)  | 5 | 3 | 7 | 15 (52%) | 11 | 2 | 0 | 13 (45%) | 29 |

## SUPPLEMENTARY MATERIAL

|                           |                                                   |          |          |          |               |          |          |          |                 |           |          |          |                 |           |  |
|---------------------------|---------------------------------------------------|----------|----------|----------|---------------|----------|----------|----------|-----------------|-----------|----------|----------|-----------------|-----------|--|
|                           | relationship with treating team)                  |          |          |          |               |          |          |          |                 |           |          |          |                 |           |  |
|                           | 209. Ease of navigating through service providers | 1        | 0        | 4        | 5 (17%)       | 1        | 6        | 7        | 14 (48%)        | 7         | 2        | 1        | 10 (34%)        | 29        |  |
| Outcomes – Carer outcomes | 210. <b>Carer quality of life</b>                 | <b>0</b> | <b>0</b> | <b>0</b> | <b>0 (0%)</b> | <b>0</b> | <b>3</b> | <b>6</b> | <b>9 (31%)</b>  | <b>15</b> | <b>2</b> | <b>3</b> | <b>20 (69%)</b> | <b>29</b> |  |
|                           | 211. <b>Carer stress</b>                          | <b>0</b> | <b>0</b> | <b>0</b> | <b>0 (0%)</b> | <b>0</b> | <b>2</b> | <b>7</b> | <b>9 (31%)</b>  | <b>10</b> | <b>4</b> | <b>6</b> | <b>20 (69%)</b> | <b>29</b> |  |
|                           | 212. <b>Carer confidence</b>                      | <b>0</b> | <b>0</b> | <b>0</b> | <b>0 (0%)</b> | <b>0</b> | <b>3</b> | <b>7</b> | <b>10 (34%)</b> | <b>13</b> | <b>3</b> | <b>3</b> | <b>19 (66%)</b> | <b>29</b> |  |
|                           | 213. <b>Carer wellbeing</b>                       | <b>0</b> | <b>0</b> | <b>0</b> | <b>0 (0%)</b> | <b>0</b> | <b>3</b> | <b>7</b> | <b>10 (34%)</b> | <b>11</b> | <b>3</b> | <b>5</b> | <b>19 (66%)</b> | <b>29</b> |  |
|                           | 214. <b>Families/care rs participation</b>        | <b>0</b> | <b>0</b> | <b>0</b> | <b>0 (0%)</b> | <b>1</b> | <b>1</b> | <b>8</b> | <b>10 (34%)</b> | <b>14</b> | <b>4</b> | <b>1</b> | <b>19 (66%)</b> | <b>29</b> |  |
|                           | 215. <b>Carer needs</b>                           | <b>0</b> | <b>0</b> | <b>0</b> | <b>0 (0%)</b> | <b>1</b> | <b>3</b> | <b>9</b> | <b>13 (45%)</b> | <b>12</b> | <b>2</b> | <b>2</b> | <b>16 (55%)</b> | <b>29</b> |  |
|                           | 216. Third-party disability                       | 1        | 0        | 1        | 2 (7%)        | 3        | 5        | 10       | 18 (62%)        | 6         | 1        | 2        | 9 (31%)         | 29        |  |

\* Note: participants were asked to rate how important it is to always collect the following data items and outcomes [shown above] for all rehabilitation patients in order to describe care and outcomes.

\*\*Note: Items rated 7-9 by ≥ 50% of respondents were presented in round 3 - indicated in bold.

## SUPPLEMENTARY MATERIAL

*\*\*\*Note: Additional codes included from the findings of other studies within the project group (i.e., Nominal group technique with expert panel and scoping review) included: Patient basic demographic information (“Socioeconomic status”, “Country of birth”, “Marital status”, “Children”), Satisfaction and experience (“Therapeutic alliance (patient relationship with treating team)”, “Physical access” and “Communication access”).*
