# Supplementary material for: Development of a minimum dataset for subacute rehabilitation: a three-round e-Delphi consensus study
Source: HighWire-hosted journal article supplement (doi:10.1136/bmjopen-2021-058725), 2022-03-01
Supplement: bmjopen-2021-058725supp004_data_supplement.pdf [file bmjopen-2021-058725supp004_data_supplement.pdf]

# Rehabilitation Data Set

## Data dictionary

### Data elements

#### Demographics

##### Person Identifier

|                       |                                                                                                                                                              |
|-----------------------|--------------------------------------------------------------------------------------------------------------------------------------------------------------|
| Definition:           | The patient identifier (UR number) is a unique record number assigned to a person for the purpose of uniquely identifying them within a healthcare facility. |
| Format:               | Alphanumeric; code X[X(19)] Character length – 1-20                                                                                                          |
| Codeset values:       | A valid identifier assigned using the Assignment of unique identifier standard                                                                               |
| Source data standard: | Queensland Health Admitted Patient Care Data Set                                                                                                             |

##### Age

|                       |                                                                                                                                                                       |
|-----------------------|-----------------------------------------------------------------------------------------------------------------------------------------------------------------------|
| Definition:           | A patient's age is their age in years at the time of their admission to rehabilitation. It is calculated as the episode begin date minus the patient's date of birth. |
| Format:               | Numeral                                                                                                                                                               |
| Codeset values:       | Any number above 1 in years.                                                                                                                                          |
| Source data standard: | Australasian Rehabilitation Outcomes Centre Inpatient Data Dictionary V4 for Analysts-Australian Version                                                              |

##### Indigenous Status

|                       |                                                                                                                                                                                                                                                                                                                                                                                                        |
|-----------------------|--------------------------------------------------------------------------------------------------------------------------------------------------------------------------------------------------------------------------------------------------------------------------------------------------------------------------------------------------------------------------------------------------------|
| Definition:           | Whether a person identifies as being of Aboriginal or Torres Strait Islander origin                                                                                                                                                                                                                                                                                                                    |
| Format:               | Numeric code                                                                                                                                                                                                                                                                                                                                                                                           |
| Codeset values:       | <ul style="list-style-type: none"> <li>1 Aboriginal but not Torres Strait Islander origin</li> <li>2 Torres Strait Islander but not Aboriginal origin</li> <li>3 Both Aboriginal and Torres Strait Islander origin</li> <li>4 Neither Aboriginal nor Torres Strait Islander origin</li> <li>8 Not stated/unknown - follow-up required</li> <li>9 Not stated/unknown - no follow-up required</li> </ul> |
| Source data standard: | <p><i>Applicable data sources:</i></p> <p>Queensland Data Standard<br/> <a href="https://health.gld.gov.au">Person and Provider Identification Data Set-Definitions (health.gld.gov.au)</a><br/> Australasian Rehabilitation Outcomes Centre Inpatient Data Dictionary V4 for Analysts-Australian Version (codes 8 and 9 = Not stated or inadequately defined)</p>                                     |

##### Sex

|                       |                                                                                                                                                                                                                                                                                                                                                                                                 |
|-----------------------|-------------------------------------------------------------------------------------------------------------------------------------------------------------------------------------------------------------------------------------------------------------------------------------------------------------------------------------------------------------------------------------------------|
| Definition:           | Sex refers to a person's biological characteristics. A person's sex is usually described as being either male or female. A person may have both male and female characteristics, or neither male nor female characteristics, or other sexual characteristics.                                                                                                                                   |
| Format:               | Numeric code                                                                                                                                                                                                                                                                                                                                                                                    |
| Codeset values:       | <ul style="list-style-type: none"> <li>1 Male</li> <li>2 Female</li> <li>3 Other</li> <li>9 Not stated/ Inadequately described</li> </ul>                                                                                                                                                                                                                                                       |
| Source data standard: | <p>Australian Institute of Health and Welfare Person-sex METeOR Identifier: 635126 Australian Bureau of Statistics 2016. Standard for Sex and Gender Variables (Cat. no. 1200.0.55.012). Attorney-General's Department 2015. Australian Government Guidelines on the Recognition of Sex and Gender.</p> <p>Queensland source standard: Queensland Hospital Admitted Patient Data Collection</p> |

## Language

|                       |                                                                                                                                                |
|-----------------------|------------------------------------------------------------------------------------------------------------------------------------------------|
| Definition:           | Preferred language of the person receiving rehabilitation services (including sign language)                                                   |
| Format:               | Coded text                                                                                                                                     |
| Codeset values:       | Any value from Appendix G - Language Codes of the <a href="#">Queensland Hospital Admitted Patient Data Collection (QHAPDC) 2020-2021 V1.0</a> |
| Source data standard: | <a href="#">Queensland Hospital Admitted Patient Data Collection (QHAPDC) 2020-2021 V1.0</a>                                                   |

## Need for an interpreter

|                      |                                                                                                                                          |
|----------------------|------------------------------------------------------------------------------------------------------------------------------------------|
| Definition:          | Whether an interpreter service is required by or for a person (including sign language)                                                  |
| Format:              | Numeric code                                                                                                                             |
| Codeset values:      | 1 Interpreter needed<br>2 Interpreter not needed<br>9 Unknown                                                                            |
| Source data standard | Queensland Hospital Admitted Patient Data Collection (QHAPDC) 2020-2021 V1.0 pp. 109 – 110. 7.38 Interpreter required (public hospitals) |

## Premorbid health and psychosocial status

### Medical/health history

|                       |                                                                                                                                                                                                                                                                                                                                                                                                                                                                                                                                                                                                                                              |
|-----------------------|----------------------------------------------------------------------------------------------------------------------------------------------------------------------------------------------------------------------------------------------------------------------------------------------------------------------------------------------------------------------------------------------------------------------------------------------------------------------------------------------------------------------------------------------------------------------------------------------------------------------------------------------|
| Definition:           | The previous medical conditions experienced by the person.                                                                                                                                                                                                                                                                                                                                                                                                                                                                                                                                                                                   |
| Format:               | Coded text                                                                                                                                                                                                                                                                                                                                                                                                                                                                                                                                                                                                                                   |
| Codeset values:       | Any valid code from SNOMED CT-AU, mapped according to the following categories for AROC reporting purposes.<br>Cardiac disease<br>Respiratory disease<br>Drug and alcohol abuse<br>Dementia<br>Delirium, pre-existing<br>Mental health problem<br>Renal failure with dialysis<br>Renal failure NO dialysis<br>Epilepsy<br>Parkinson's disease<br>Stroke<br>Spinal cord injury/disease<br>Brain injury<br>Multiple sclerosis<br>Hearing impairment<br>Diabetes mellitus<br>Morbid obesity<br>Inflammatory arthritis<br>Osteoarthritis<br>Osteoporosis<br>Chronic pain<br>Cancer<br>Pressure ulcer, pre-existing<br>Visual impairment<br>Other |
| Source data standard: | ieMR problems list with categories accessed via the Australasian Rehabilitation Outcomes Centre Inpatient Data Dictionary V4 for Analysts-Australian Version                                                                                                                                                                                                                                                                                                                                                                                                                                                                                 |

## Sensory impairments

|                       |                                                                                                                                                                                                    |
|-----------------------|----------------------------------------------------------------------------------------------------------------------------------------------------------------------------------------------------|
| Definition:           | Details about a person's sensory impairments which existed prior to the current episode of care.                                                                                                   |
| Format:               | Coded text                                                                                                                                                                                         |
| Codeset values:       | Blind - L eye<br>Blind - R eye<br>Hearing deficit - Left ear<br>Hearing deficit - Right ear<br>Nonverbal<br>Sensation - touch deficit<br>Speech deficit<br>Uncorrected visual impairment<br>Other: |
| Source data standard: | Collection source - ieMR                                                                                                                                                                           |

## Drug and alcohol history

|                       |                                                                                                                                                                                                                                                                                                                               |
|-----------------------|-------------------------------------------------------------------------------------------------------------------------------------------------------------------------------------------------------------------------------------------------------------------------------------------------------------------------------|
| Definition:           | An indicator of a person's tobacco/ alcohol/ substance use history                                                                                                                                                                                                                                                            |
| Format:               | Coded text                                                                                                                                                                                                                                                                                                                    |
| Codeset values:       | Use:<br>Yes<br>No<br>Not indicated<br><br>Details:<br>Current<br>Past<br>Not indicated<br><br>Substance type (illicit substances only)<br>Amphetamines<br>Cocaine<br>Ecstasy<br>Hallucinogens/LSD<br>Heroin<br>Inhalants/glue/solvents<br>Marijuana<br>Methamphetamines<br>Prescription Medications<br>Other<br>Not indicated |
| Source data standard: | Collection source - ieMR                                                                                                                                                                                                                                                                                                      |

## Psychosocial history – employment status

|                       |                                                                                                                         |
|-----------------------|-------------------------------------------------------------------------------------------------------------------------|
| Definition:           | The person's employment status prior to this impairment                                                                 |
| Format:               | Numeric code                                                                                                            |
| Codeset values:       | 1. Employed<br>2. Unemployed<br>3. Student<br>4. Not in labour force<br>5. Retired for age<br>6. Retired for disability |
| Source data standard: | Australasian Rehabilitation Outcomes Centre Inpatient Data Dictionary V4 for Analysts-<br>Australian Version            |

### Psychosocial history – level of education

|                       |                                                                                                                                                                          |
|-----------------------|--------------------------------------------------------------------------------------------------------------------------------------------------------------------------|
| Definition:           | The highest level of education obtained by the person                                                                                                                    |
| Format:               | Numeric code                                                                                                                                                             |
| Codeset values:       | <ol style="list-style-type: none"> <li>1. None</li> <li>2. Highschool</li> <li>3. Some College</li> <li>4. University degree</li> <li>5. Post graduate degree</li> </ol> |
| Source data standard: | Collection source - ieMR                                                                                                                                                 |

### Psychosocial history – preadmission living situation

|                       |                                                                                                                                                                                                                                                                                                    |
|-----------------------|----------------------------------------------------------------------------------------------------------------------------------------------------------------------------------------------------------------------------------------------------------------------------------------------------|
| Definition:           | The living situation of the person prior to this episode of care.                                                                                                                                                                                                                                  |
| Format:               | Numeric code                                                                                                                                                                                                                                                                                       |
| Codeset values:       | <ol style="list-style-type: none"> <li>1. Private residence</li> <li>2. Residential low level care (hostel)</li> <li>3. Residential, high level care (nursing home)</li> <li>4. Community group home</li> <li>5. Boarding house</li> <li>6. Transitional living unit.</li> <li>7. Other</li> </ol> |
| Source data standard: | Australasian Rehabilitation Outcomes Centre Inpatient Data Dictionary V4 for Analysts-<br>Australian Version                                                                                                                                                                                       |

### Psychosocial history - trauma

|                       |                                                                                       |
|-----------------------|---------------------------------------------------------------------------------------|
| Definition:           | History related to injuries, abuse or neglect in the household and the type of abuse. |
| Format:               | Coded text                                                                            |
| Codeset values:       | Yes<br>No<br>Type: Free text – character limited field                                |
| Source data standard: | Collection source - ieMR                                                              |

### Mood

|                       |                                                                                                                                 |
|-----------------------|---------------------------------------------------------------------------------------------------------------------------------|
| Definition:           | An indicator of mood at the commencement of the rehabilitation episode.                                                         |
| Format:               | Numeral between 0 and 12                                                                                                        |
| Codeset values:       | Total score (0-12)<br>Anxiety sub-scale (0-6, generated from Q1 and Q2)<br>Depression sub-scale (0-6, generated from Q3 and Q4) |
| Source data standard: | Patient Health Questionnaire-4 (PHQ-4) (proposed measure)                                                                       |

### Carer supports

|                       |                                                                                                                                                                                                                                                                                                          |
|-----------------------|----------------------------------------------------------------------------------------------------------------------------------------------------------------------------------------------------------------------------------------------------------------------------------------------------------|
| Definition:           | The level of carer support received by the patient prior to their current inpatient admission. Include both paid and unpaid support. Paid carer support includes both government funded and private health funded carers. Unpaid carer support include care provided by a relative, friend, partner etc. |
| Format:               | Numeric code                                                                                                                                                                                                                                                                                             |
| Codeset values:       | <ol style="list-style-type: none"> <li>1. No carer and does not need one.</li> <li>2. No carer and needs one</li> <li>3. Carer not living in</li> <li>4. Carer living in, not co-dependent.</li> <li>5. Carer living in, co-dependent.</li> </ol>                                                        |
| Source data standard: | Australasian Rehabilitation Outcomes Centre Inpatient Data Dictionary V4 for Analysts-<br>Australian Version                                                                                                                                                                                             |

## Community supports

|                       |                                                                                                                                                                             |
|-----------------------|-----------------------------------------------------------------------------------------------------------------------------------------------------------------------------|
| Definition:           | Details of the community supports that a person received in the month prior to admission.                                                                                   |
| Format:               | Y/N                                                                                                                                                                         |
| Codeset values:       | Domestic assistance<br>Social support<br>Nursing care<br>Allied health<br>Personal care<br>Meals<br>Provision of goods & equipment<br>Transport services<br>Case management |
| Source data standard: | Australasian Rehabilitation Outcomes Centre Inpatient Data Dictionary V4 for Analysts-Australian Version                                                                    |

## Admission information

### Total length of stay in hospital

|                       |                                                                                                                                                                                                                                          |
|-----------------------|------------------------------------------------------------------------------------------------------------------------------------------------------------------------------------------------------------------------------------------|
| Definition:           | The total length of patient's inpatient stay calculated from the date of admission to date of separation. This includes all coded episodes of care for the admission (e.g. acute care, rehabilitation, maintenance, palliative care etc) |
| Format:               | Numeral                                                                                                                                                                                                                                  |
| Codeset values:       | Any valid numeral                                                                                                                                                                                                                        |
| Source data standard: | Queensland Hospital Admitted Patient Data Collection (QHAPDC) 2020-2021 V1.0                                                                                                                                                             |

### Length of stay of rehabilitation

|                       |                                                                                                                                                                                        |
|-----------------------|----------------------------------------------------------------------------------------------------------------------------------------------------------------------------------------|
| Definition:           | The total length of stay in the rehabilitation unit or service, or the SNAP rehabilitation care date where there is no rehabilitation specific unit (e.g. mixed acute and rehab ward). |
| Format:               | Numeral                                                                                                                                                                                |
| Codeset values:       | Any valid number                                                                                                                                                                       |
| Source data standard: | Queensland Hospital Admitted Patient Data Collection (QHAPDC) 2020-2021 V1.0                                                                                                           |

### Suspension of rehabilitation

|                       |                                                                                                          |
|-----------------------|----------------------------------------------------------------------------------------------------------|
| Definition:           | The total number of rehabilitation treatment suspension occurrences during this admission.               |
| Format:               | Numeral                                                                                                  |
| Codeset values:       | Any valid number (0 where there is no suspension)                                                        |
| Source data standard: | Australasian Rehabilitation Outcomes Centre Inpatient Data Dictionary V4 for Analysts-Australian Version |

### Reason for rehabilitation

|                 |                                                                               |                                                                                                                                              |
|-----------------|-------------------------------------------------------------------------------|----------------------------------------------------------------------------------------------------------------------------------------------|
| Definition:     | The primary reason for a patient undergoing a rehabilitation episode of care. |                                                                                                                                              |
| Format:         | Coded text                                                                    |                                                                                                                                              |
| Codeset values: | <i>RST</i> <i>Stroke</i>                                                      | Left Body Involvement, Right Body Involvement, Bilateral Involvement, No Paresis, Other Stroke                                               |
|                 | <i>RBD</i> <i>Brain dysfunction</i>                                           | Non-Traumatic –Sub-arachnoid haemorrhage, Anoxic brain damage, Other non-traumatic brain dysfunction, Traumatic -Open Injury, Closed Injury. |
|                 | <i>RNE</i> <i>Neurological conditions</i>                                     | Multiple Sclerosis, Parkinsonism, Polyneuropathy, Guillian-Barre, Cerebral Palsy, Neuromuscular disorders, Other neurological conditions     |

|            |                                              |                                                                                                                                                                                                                                                                                                                                                                                                                                                                                                      |
|------------|----------------------------------------------|------------------------------------------------------------------------------------------------------------------------------------------------------------------------------------------------------------------------------------------------------------------------------------------------------------------------------------------------------------------------------------------------------------------------------------------------------------------------------------------------------|
| <i>RSC</i> | <i>Spinal cord dysfunction</i>               | Non-Traumatic spinal cord dysfunction -Incomplete paraplegia, Complete paraplegia, Incomplete C1-4 quadriplegia, Incomplete C5-8 quadriplegia, Complete C1-4 quadriplegia, Complete C5-8 quadriplegia, Other non-traumatic spinal cord dysfunction, Traumatic spinal cord dysfunction - Incomplete paraplegia, Complete paraplegia, Incomplete C1-4 quadriplegia, Incomplete C5-8 quadriplegia, Complete C1-4 quadriplegia, Complete C5-8 quadriplegia, Other non-traumatic spinal cord dysfunction. |
| <i>RAL</i> | <i>Amputation of limb</i>                    | Single upper extremity above the elbow, Single upper extremity below the elbow, Single lower extremity above the knee, Single lower extremity below the knee, Double lower extremity above the knee, Double lower extremity above/below the knee, Double lower extremity below the knee, Partial foot, Other amputation not from trauma                                                                                                                                                              |
| <i>RAR</i> | <i>Arthritis</i>                             | Rheumatoid Arthritis, Osteoarthritis, Other Arthritis.                                                                                                                                                                                                                                                                                                                                                                                                                                               |
| <i>RPS</i> | <i>Pain syndromes</i>                        | Neck pain, Back pain, Extremity pain, Headache, Multi-site pain, Other pain.                                                                                                                                                                                                                                                                                                                                                                                                                         |
| <i>ROF</i> | <i>Orthopaedic conditions - fractures,</i>   | Includes: Fracture of hip -unilateral, Fracture of hip – bilateral, Fracture of shaft of femur, Fracture of pelvis, Fracture of knee, Fracture of lower leg or ankle or foot, Fracture of upper limb, Fracture of spine, Fracture of multiple sites, Other orthopaedic fracture.                                                                                                                                                                                                                     |
| <i>ROR</i> | <i>Orthopaedic conditions - replacements</i> | Includes: Hip replacement unilateral or bilateral, Knee replacement – unilateral or bilateral, Knee and hip replacement – same or different side, Shoulder replacement.                                                                                                                                                                                                                                                                                                                              |
| <i>ROA</i> | <i>Orthopaedic conditions – all other</i>    | Soft tissue injury.                                                                                                                                                                                                                                                                                                                                                                                                                                                                                  |
| <i>RCA</i> | <i>Cardiac</i>                               | Following recent onset of new cardiac impairment, Chronic cardiac insufficiency, Heart and heart/lung transplant                                                                                                                                                                                                                                                                                                                                                                                     |
| <i>RPU</i> | <i>Pulmonary</i>                             | Chronic obstructive pulmonary disease, Lung transplant, Other pulmonary                                                                                                                                                                                                                                                                                                                                                                                                                              |
| <i>RBU</i> | <i>Burns</i>                                 | Burns                                                                                                                                                                                                                                                                                                                                                                                                                                                                                                |
| <i>RCD</i> | <i>Congenital deformities</i>                | Spina Bifida, Other Congenital deformities                                                                                                                                                                                                                                                                                                                                                                                                                                                           |
| <i>ROI</i> | <i>Other disabling impairments</i>           | Lymphoedema, Conversion disorder, Other disabling Impairments – that cannot be classified into a specific group.                                                                                                                                                                                                                                                                                                                                                                                     |
| <i>RMT</i> | <i>Major multiple trauma</i>                 | Brain and spinal cord injury, Brain and multiple fracture/amputation, Spinal and multiple fracture/amputation, Other multiple trauma.                                                                                                                                                                                                                                                                                                                                                                |
| <i>RDD</i> | <i>Developmental disabilities</i>            | Developmental disabilities (excluding Cerebral Palsy)                                                                                                                                                                                                                                                                                                                                                                                                                                                |
| <i>RDE</i> | <i>Debility</i>                              | Re-conditioning following surgery, Reconditioning following medical illness, Cancer rehabilitation.                                                                                                                                                                                                                                                                                                                                                                                                  |

Source data standard: Queensland Hospital Admitted Patient Data Collection (QHAPDC) 2020-2021 V1.0

## Service delivery and interventions

### Rehabilitation setting

|                       |                                                                                                 |
|-----------------------|-------------------------------------------------------------------------------------------------|
| Definition:           | The type of patient for which a service is being provided, for example inpatient or outpatient. |
| Format:               | Coded text                                                                                      |
| Codeset values:       | 1. Inpatient<br>2. Outpatient<br>3. Community                                                   |
| Source data standard: | Collection source - ieMR                                                                        |

### Collaborative goal setting

|                 |                                                                                                              |
|-----------------|--------------------------------------------------------------------------------------------------------------|
| Definition:     | The completion of collaborative patient-centred goal setting to inform rehabilitation care and interventions |
| Format:         | Coded text                                                                                                   |
| Codeset values: | Yes<br>No<br>Type: Free text – character limited field                                                       |

### Intervention date

|                       |                                           |
|-----------------------|-------------------------------------------|
| Definition:           | The date that the service event commenced |
| Format:               | DDMMYY                                    |
| Codeset values:       | Any valid date                            |
| Source data standard: | Collection source - ieMR                  |

### Intervention type

|                       |                                                                                                                                                                                       |
|-----------------------|---------------------------------------------------------------------------------------------------------------------------------------------------------------------------------------|
| Definition:           | The type of intervention provided to a patient during a rehabilitation episode                                                                                                        |
| Format:               | Coded text                                                                                                                                                                            |
| Codeset values:       | 1. Assessment and evaluation (including goal setting)<br>2. Education (knowledge, skills and self-management)<br>3. Risk Management<br>4. Intervention<br>5. Liaison and coordination |
| Source data standard: | Collection source - ieMR                                                                                                                                                              |

### Intervention duration

|                       |                                                                                                                                                                     |
|-----------------------|---------------------------------------------------------------------------------------------------------------------------------------------------------------------|
| Definition:           | The duration of clinical care activity provided to a person or group in the rehabilitation service that can be assigned (in whole or part) to an individual patient |
| Format:               | Numerical, maximum 4 digits                                                                                                                                         |
| Codeset values:       | Valid duration recorded in minutes                                                                                                                                  |
| Source data standard: | Collection source - ieMR                                                                                                                                            |

## Barriers to intervention

|                       |                                                                                                                                                                                                                                                                                                                                            |
|-----------------------|--------------------------------------------------------------------------------------------------------------------------------------------------------------------------------------------------------------------------------------------------------------------------------------------------------------------------------------------|
| Definition:           | Barriers to providing specific interventions to a person in the rehabilitation service by the healthcare professional.                                                                                                                                                                                                                     |
| Format:               | Coded text                                                                                                                                                                                                                                                                                                                                 |
| Codeset values:       | <ol style="list-style-type: none"> <li>1. Patient absent</li> <li>2. Patient declined</li> <li>3. Patient in pain</li> <li>4. Patient unwell</li> <li>5. Other patient reason</li> <li>6. Staff-related barrier</li> <li>7. Staff reprioritisation due to workload</li> <li>8. Staff unavailable</li> <li>9. Other staff reason</li> </ol> |
| Source data standard: | Collection source - ieMR                                                                                                                                                                                                                                                                                                                   |

## Treating disciplines

|                       |                                                                                                                            |
|-----------------------|----------------------------------------------------------------------------------------------------------------------------|
| Definition:           | Details of the professions involved in the treatment of a patient in a rehabilitation setting, as represented by a code.   |
| Format:               | Coded text                                                                                                                 |
| Codeset values:       | Any valid clinician code, grouped for reporting e.g. nursing, allied health professional, allied health assistant, medical |
| Source data standard: | Collection source - ieMR                                                                                                   |

## Occasions of service

|                       |                                                                                             |
|-----------------------|---------------------------------------------------------------------------------------------|
| Definition:           | The number of occasions of service provided to a patient during the rehabilitation episode. |
| Format:               | Numeral                                                                                     |
| Codeset values:       | Any valid numeral                                                                           |
| Source data standard: | Collection source - ieMR                                                                    |

## Intervention - mode of delivery

|                       |                                                                                                                                                              |
|-----------------------|--------------------------------------------------------------------------------------------------------------------------------------------------------------|
| Definition:           | The method of delivery of an intervention between a patient and a healthcare provider.                                                                       |
| Format:               | Coded text                                                                                                                                                   |
| Codeset values:       | <ol style="list-style-type: none"> <li>1. Face-to-face</li> <li>2. Telephone</li> <li>3. Telehealth</li> <li>4. Chart only</li> <li>5. Home visit</li> </ol> |
| Source data standard: | Collection source - ieMR                                                                                                                                     |

## Intervention – individual/ group

|                       |                                                                                                                   |
|-----------------------|-------------------------------------------------------------------------------------------------------------------|
| Definition:           | Whether the intervention is provided to a patient in an individual on-to-one care setting, or in a group setting. |
| Format:               | Coded text                                                                                                        |
| Codeset values:       | <ol style="list-style-type: none"> <li>1. Individual</li> <li>2. Group</li> </ol>                                 |
| Source data standard: | Collection source - ieMR                                                                                          |



## Intervention – interprofessional

|                       |                                                                                                                                    |
|-----------------------|------------------------------------------------------------------------------------------------------------------------------------|
| Definition:           | Whether the individual intervention is provided by a single discipline or more than one discipline in an interprofessional manner. |
| Format:               | Coded text                                                                                                                         |
| Codeset values:       | 1. Single discipline<br>2. Interprofessional                                                                                       |
| Source data standard: | Collection source - ieMR                                                                                                           |

## Medication interventions

|                       |                                                                                                                                                                                                                                                                                                                                                                       |
|-----------------------|-----------------------------------------------------------------------------------------------------------------------------------------------------------------------------------------------------------------------------------------------------------------------------------------------------------------------------------------------------------------------|
| Definition:           | A list of the medications administered during the rehabilitation episode, sorted by therapeutic class.                                                                                                                                                                                                                                                                |
| Format:               | Coded text                                                                                                                                                                                                                                                                                                                                                            |
| Codeset values:       | Any medication, classified for visualisation into therapeutic classes using the following categories: <ul style="list-style-type: none"> <li>- Potassium and electrolytes</li> <li>- Insulin</li> <li>- Narcotics</li> <li>- Cytotoxic</li> <li>- Heparin and anticoagulants</li> <li>- Allergies and antibiotics</li> <li>- Other (all other medications)</li> </ul> |
| Source data standard: | Collection source - ieMR                                                                                                                                                                                                                                                                                                                                              |

## Outcomes

### Goal attainment

|                       |                                                                                          |
|-----------------------|------------------------------------------------------------------------------------------|
| Definition:           | The attainment result of goals established on commencement in the rehabilitation setting |
| Format:               | Coded text                                                                               |
| Codeset values:       | 1. Goal met<br>2. Goal partially met<br>3. Goal not met                                  |
| Source data standard: | Collection source - ieMR                                                                 |

### Impairment

|                       |                                                                                                                                                                                                                                                                                                       |
|-----------------------|-------------------------------------------------------------------------------------------------------------------------------------------------------------------------------------------------------------------------------------------------------------------------------------------------------|
| Definition:           | Change/improvement in impairment at the end of rehabilitation episode                                                                                                                                                                                                                                 |
| Format:               | TBA                                                                                                                                                                                                                                                                                                   |
| Codeset values:       | TBA                                                                                                                                                                                                                                                                                                   |
| Source data standard: | Potential measures used in other datasets: AROC (ASIA Impairment Scale), UKROC (Northwick Park Dependency Scale), ICHOM (Simplified modified Rankin Scale Questionnaire), NSCISC (ASIA Impairment Scale), RIKSSTROKE (non-validated instrument), Paul Coverdell (modified Rankin Scale Questionnaire) |

### Change in functional status - total

|                       |                                                                                                                                                                                                |
|-----------------------|------------------------------------------------------------------------------------------------------------------------------------------------------------------------------------------------|
| Definition:           | The change in FIM score (total), calculated by the FIM scores collected at the beginning of the rehabilitation episode and at the end of the rehabilitation episode for an individual patient. |
| Format:               | Numeral                                                                                                                                                                                        |
| Codeset values:       | Numeral between 18 and 126                                                                                                                                                                     |
| Source data standard: | Australasian Rehabilitation Outcomes Centre (AROC) Inpatient Data Dictionary for Analysts (AU) V4                                                                                              |

## Change in functional status - subscales

|                       |                                                                                                                                                                                                                                  |
|-----------------------|----------------------------------------------------------------------------------------------------------------------------------------------------------------------------------------------------------------------------------|
| Definition:           | The change in FIM subscale scores (motor and cognition), calculated by the FIM sub-scale scores collected at the beginning of the rehabilitation episode and at the end of the rehabilitation episode for an individual patient. |
| Format:               | Numeral                                                                                                                                                                                                                          |
| Codeset values:       | Motor subscale (sum of individual motor items): numeral between 13 and 91.<br>Cognition subscale (sum of individual cognition items): numeral between 5 and 35.                                                                  |
| Source data standard: | Australasian Rehabilitation Outcomes Centre (AROC) Inpatient Data Dictionary for Analysts (AU) V4                                                                                                                                |

## Activity and participation

Status: Routine clinical information

|                       |                                                                                                                                                                                                                                                                                                                                                                                                                                                                |
|-----------------------|----------------------------------------------------------------------------------------------------------------------------------------------------------------------------------------------------------------------------------------------------------------------------------------------------------------------------------------------------------------------------------------------------------------------------------------------------------------|
| Definition:           | Level of activity and participation obtained at the end of rehabilitation episode. <i>Note: Need to consider timing of this assessment given consumer experience of rehabilitation being a lifelong journey</i>                                                                                                                                                                                                                                                |
| Format:               | TBA                                                                                                                                                                                                                                                                                                                                                                                                                                                            |
| Codeset values:       | TBA                                                                                                                                                                                                                                                                                                                                                                                                                                                            |
| Source data standard: | Potential measures used in other datasets: AROC (Employment status; Return to pre-impairment activities), UKROC (Mayo-Portland Adaptability Inventory), CIHI (Reintegration to Normal Living index), NSW BIRD (Mayo-Portland Adaptability Inventory; PROMIS-29), ICHOM (PROMIS-10), RHSCIR (Craig Hospital Inventory of Environmental Factors), NSCISC (Craig Handicap Assessment and Reporting Technique - short form), RIKSSTROKE (non-validated instrument) |

## Health related quality of life

|                       |                                                                                                                                                                                                                                                  |
|-----------------------|--------------------------------------------------------------------------------------------------------------------------------------------------------------------------------------------------------------------------------------------------|
| Definition:           | The impact of health or disease on quality of life; how well a person functions in their life and his or her perceived wellbeing in physical, mental, and social domains of health; value of health states (reference: Kirimi and Brazier, 2016) |
| Format:               | TBC                                                                                                                                                                                                                                              |
| Codeset values:       | TBC                                                                                                                                                                                                                                              |
| Source data standard: | Potential tools used in other datasets: EQ-5D, PROMIS, SF-36                                                                                                                                                                                     |

## Patient experience

|                       |                                                                                          |
|-----------------------|------------------------------------------------------------------------------------------|
| Definition:           | Information about the patient's perception of the experience of inpatient rehabilitation |
| Format:               | TBC                                                                                      |
| Codeset values:       | TBC                                                                                      |
| Source data standard: | TBC                                                                                      |

## Patient satisfaction

|                       |                                                                               |
|-----------------------|-------------------------------------------------------------------------------|
| Definition:           | A measure of a patient's overall satisfaction with the rehabilitation episode |
| Format:               | TBC                                                                           |
| Codeset values:       | TBC                                                                           |
| Source data standard: | TBC                                                                           |

## Complications and adverse events

|                 |                                                                                                                                                                                                                                                          |
|-----------------|----------------------------------------------------------------------------------------------------------------------------------------------------------------------------------------------------------------------------------------------------------|
| Definition:     | A hospital-acquired complication (HAC) refers to a complication for which clinical risk mitigation strategies may reduce (but not necessarily eliminate) the risk of that complication occurring.                                                        |
| Format:         | Coded text                                                                                                                                                                                                                                               |
| Codeset values: | <ol style="list-style-type: none"> <li>1. Pressure injury</li> <li>2. Falls resulting in fracture or intracranial injury</li> <li>3. Healthcare associated infection</li> <li>4. Respiratory complications</li> <li>5. Venous thromboembolism</li> </ol> |

- 
6. Renal failure
  7. Gastrointestinal bleeding
  8. Medication complications
  9. Delirium
  10. Persistent incontinence
  11. Malnutrition
  12. Cardiac complications
- 

Source data standard: Hospital acquired complications v3.1 [Hospital-Acquired Complications \(HACs\) List - Specifications - Version 3.1 | Australian Commission on Safety and Quality in Health Care](#)

---

## Number of readmissions

**Definition:** An avoidable hospital readmission occurs when a patient who has been discharged from hospital (index admission) is admitted again within 28 days, and the readmission is a) clinically related to the index admission, and b) has the potential to be avoided through improved clinical management and/or appropriate discharge planning in the index admission

---

**Format:** Numeral

---

**Codeset values:** Any valid numeral

---

**Source data standard:** Queensland Hospital Admitted Patient Data Collection (QHAPDC) 2020-2021 V1.0

---

## Caregiver information and outcomes

### Current caregiver status

**Definition:** The current caregiver status of the person to take on the caregiving role after the rehabilitation episode

---

**Format:** Coded text

---

**Codeset values:** 1. Yes, currently caregiver for this person  
2. No, not currently caregiver for this person

---

**Source data standard:** Collection source - ieMR

---

### Caregiver capacity and willingness to care

**Definition:** The physical, emotional, social, and psychological capacity and willingness to take on the planned caregiver role, as assessed early in the rehabilitation episode.

---

**Format:** TBA

---

**Codeset values:** TBA

---

**Source data standard:** Suggested tool: Preparedness for Caregiving Scale (Henriksson et al 2013)

---

### Caregiver preparedness

**Definition:** Caregiver reflection on how prepared they were in taking on the caregiving role, as assessed after completion of the rehabilitation episode

---

**Format:** TBA

---

**Codeset values:** TBA

---

**Source data standard:** Suggested tool: Preparedness for Caregiving Scale (Henriksson et al 2013)

---

### Caregiver experience

**Definition:** The caregiver's experience with the rehabilitation episode, as experienced by them (not as a proxy for the patient)

---

**Format:** TBA

---

**Codeset values:** TBA

---

**Source data standard:** TBA – no tool identified.

---
